# Supplementary material
Source: PubMed Central journal article supplement (PMC6646282)

## ***Supporting Information***

### **Synthesis and evaluation of antiplasmodial efficacy of $\beta$ -carboline derivatives against murine malaria**

Varun Gorki,<sup>a,†</sup> Rahul Singh,<sup>b,†</sup> Neha Sylvia Walter,<sup>a</sup> Upma Bagai,<sup>a,\*</sup> Deepak B. Salunke<sup>b,\*</sup>

<sup>a</sup>Parasitology Laboratory, Department of Zoology, Panjab University, Chandigarh 160014, India

<sup>b</sup>Department of Chemistry and Centre of Advanced Studies in Chemistry, Panjab University, Chandigarh 160014, India.

#### **\*Corresponding Authors**

Dr. Deepak B. Salunke, Assistant Professor, Department of Chemistry and Centre of Advanced Studies in Chemistry, Panjab University, Chandigarh-160014, India. Email: [salunke@pu.ac.in](mailto:salunke@pu.ac.in)

Prof. Upma Bagai, Professor, Department of Zoology, Panjab University, Chandigarh-160014, India. Email: [upmabagai@yahoo.co.in](mailto:upmabagai@yahoo.co.in)

<sup>†</sup>Both the authors contributed equally to this work.

[ghai29@yahoo.co.in](mailto:ghai29@yahoo.co.in)

[singhrahul9041@gmail.com](mailto:singhrahul9041@gmail.com)

[walterneha@gmail.com](mailto:walterneha@gmail.com)

## Table of Content

| <b>Sr. No.</b> | <b>Contents</b>                                                 | <b>Page No.</b> |
|----------------|-----------------------------------------------------------------|-----------------|
| 1.             | Analytical data for compound <b>8a</b>                          | S3-S5           |
| 2.             | Analytical data for compound <b>9a</b>                          | S6-S8           |
| 3.             | Analytical data for compound <b>8b</b>                          | S9-S11          |
| 4.             | Analytical data for compound <b>9b</b>                          | S12-S14         |
| 5.             | Analytical data for compound <b>8c</b>                          | S15-S17         |
| 6.             | Analytical data for compound <b>9c</b>                          | S18-S20         |
| 7.             | Analytical data for compound <b>8d</b>                          | S21-S24         |
| 8.             | Analytical data for compound <b>9d</b>                          | S25-S28         |
| 9.             | Analytical data for compound <b>10</b>                          | S29-S30         |
| 10.            | Pictet-Spengler Reaction Mechanism and Optimization of Reaction | S31-S32         |

Figure S1: <sup>1</sup>H NMR (400 MHz): 8a CDCl<sub>3</sub>

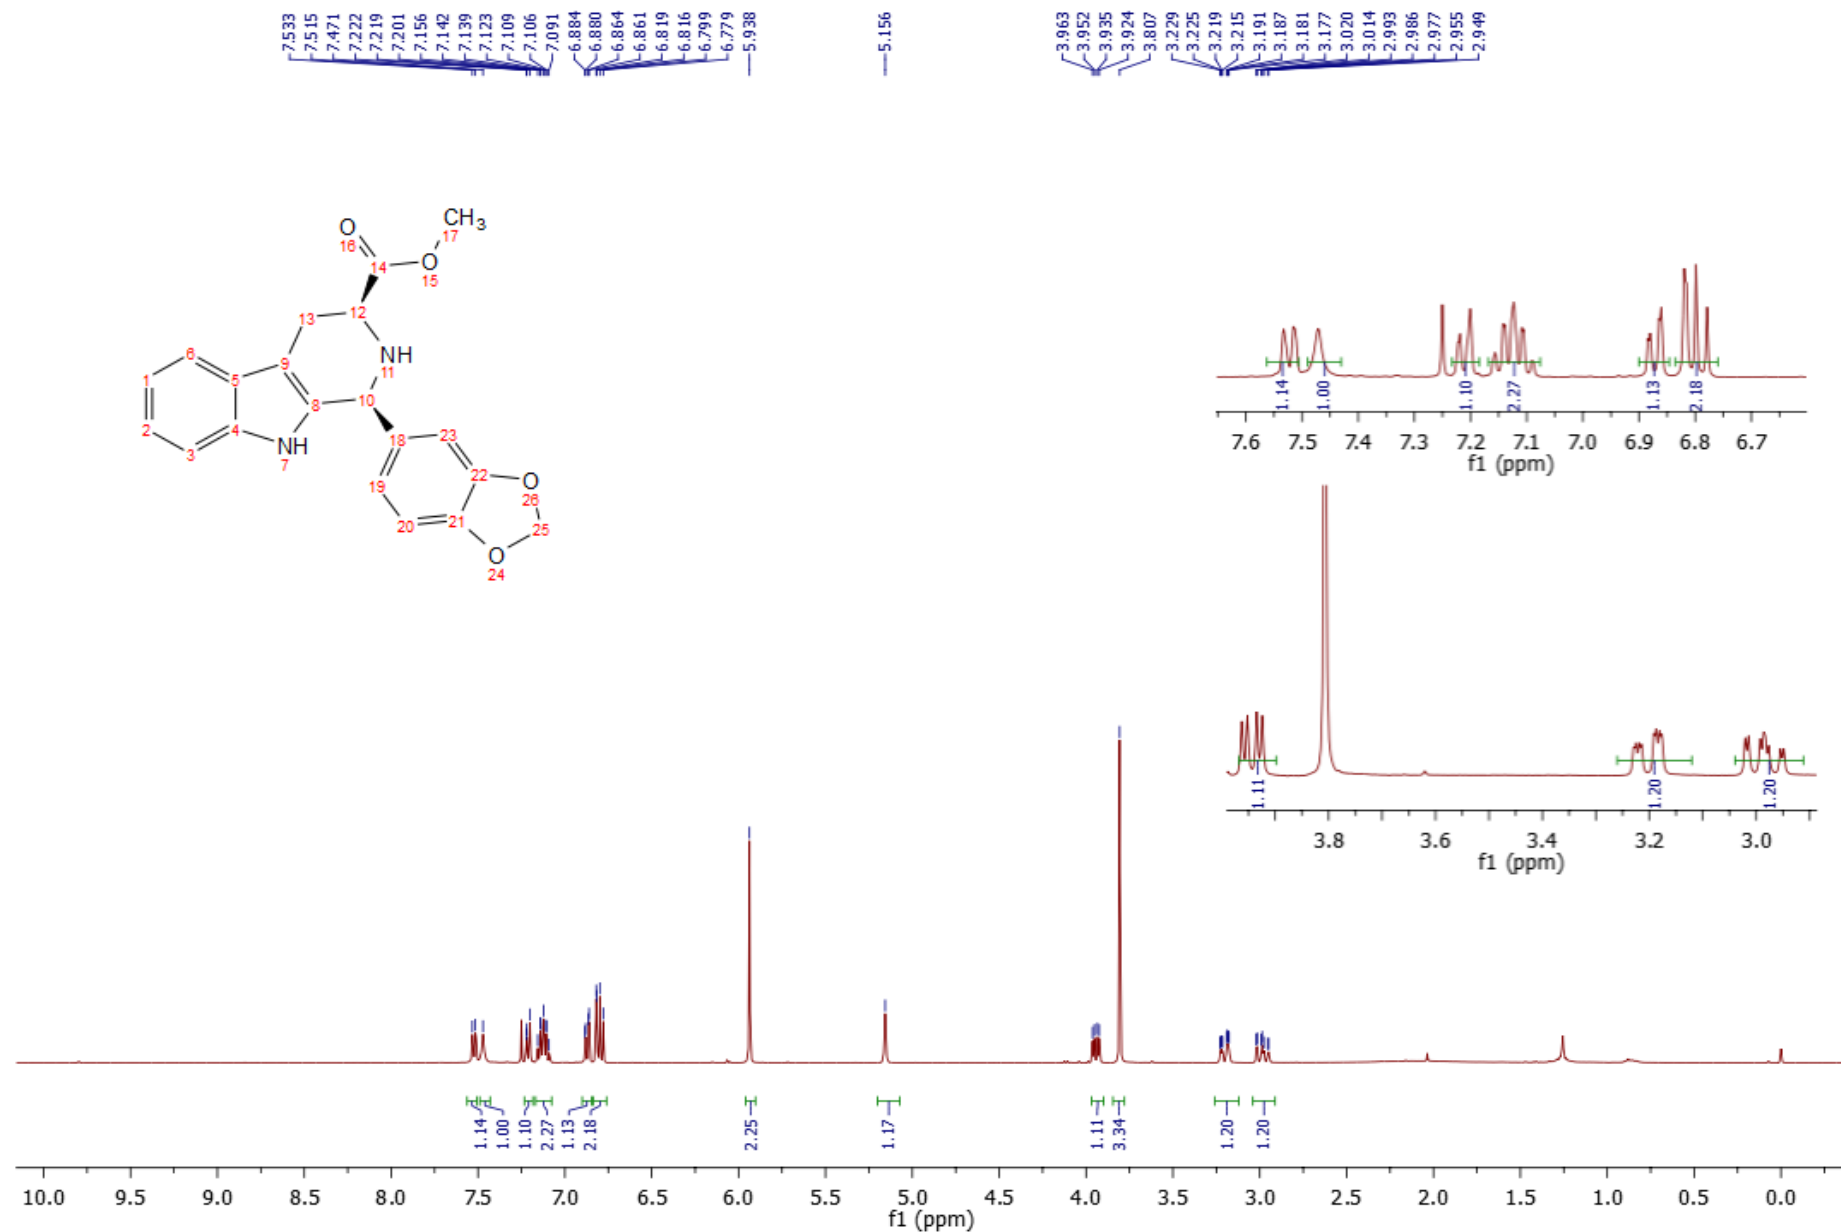

Figure S2: FT-IR (Neat): 8a

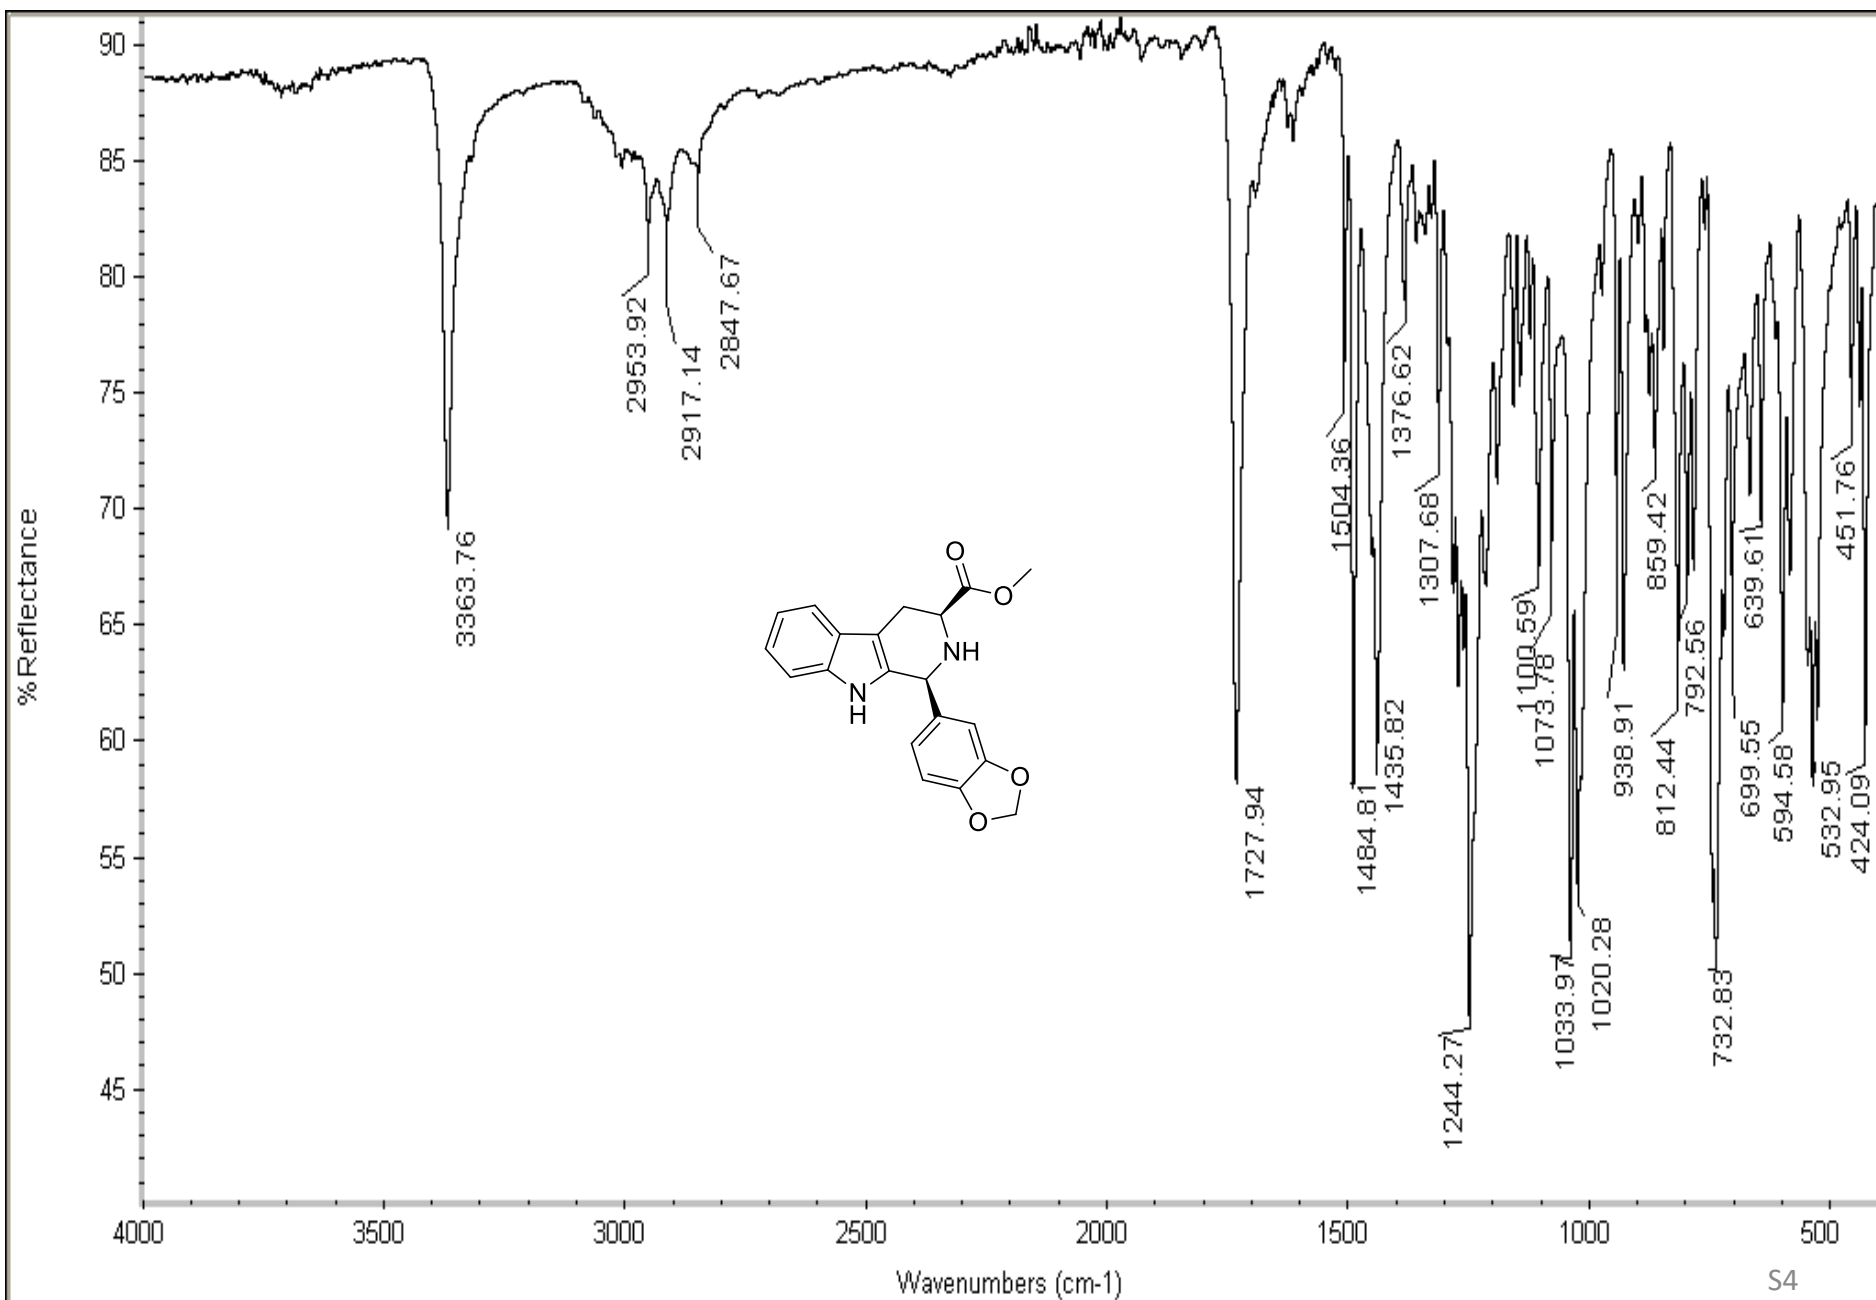

Figure S3: LC-MS: 8a

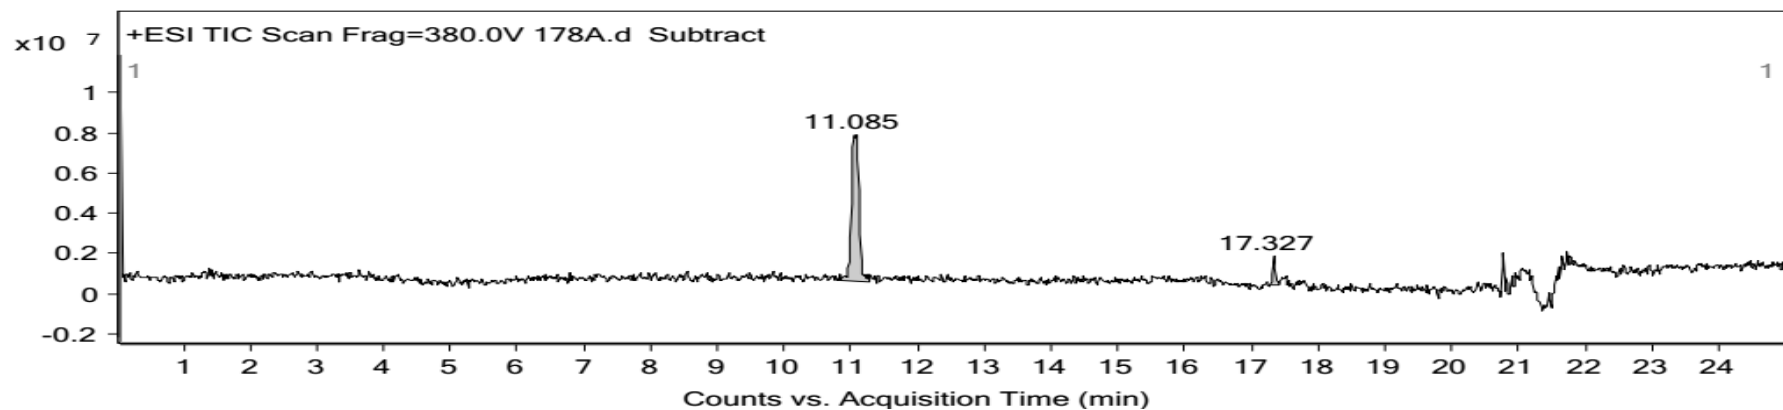

Signal DAD1 B, Sig=280,4 Ref=360,100 (PU\PU Sequence 2018-04-17 21-01-47\RS-178A.D) - DAD1

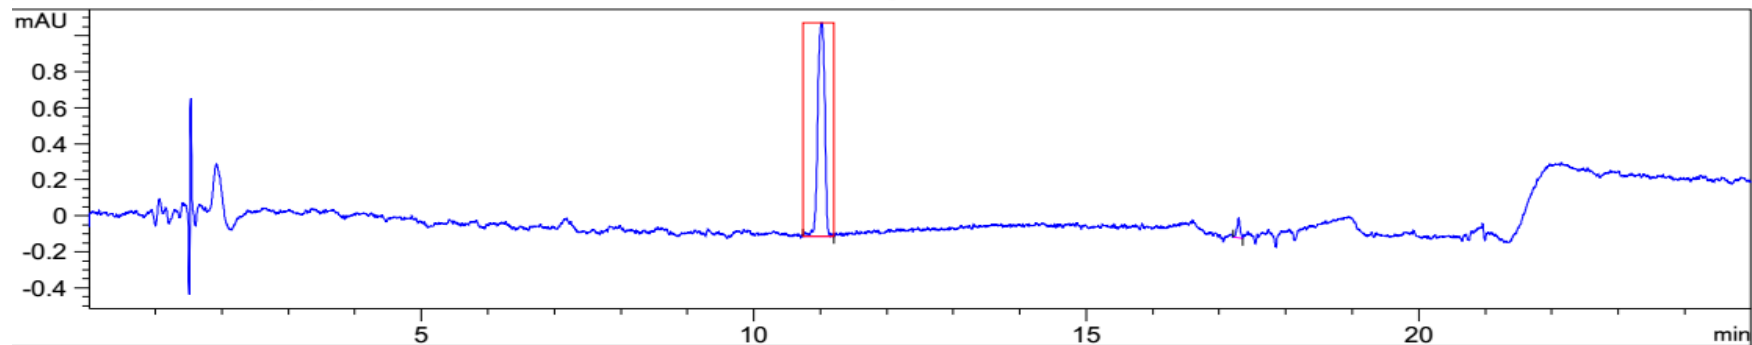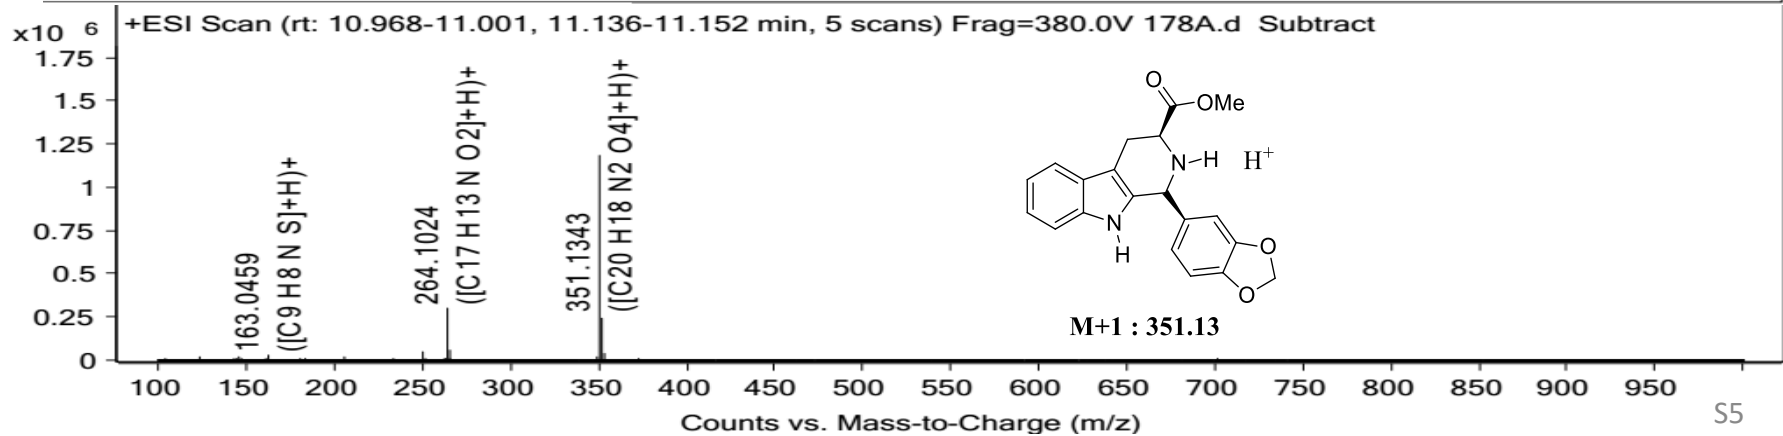

Figure S4:  $^1\text{H}$  NMR (400 MHz): 9a  $\text{CDCl}_3$

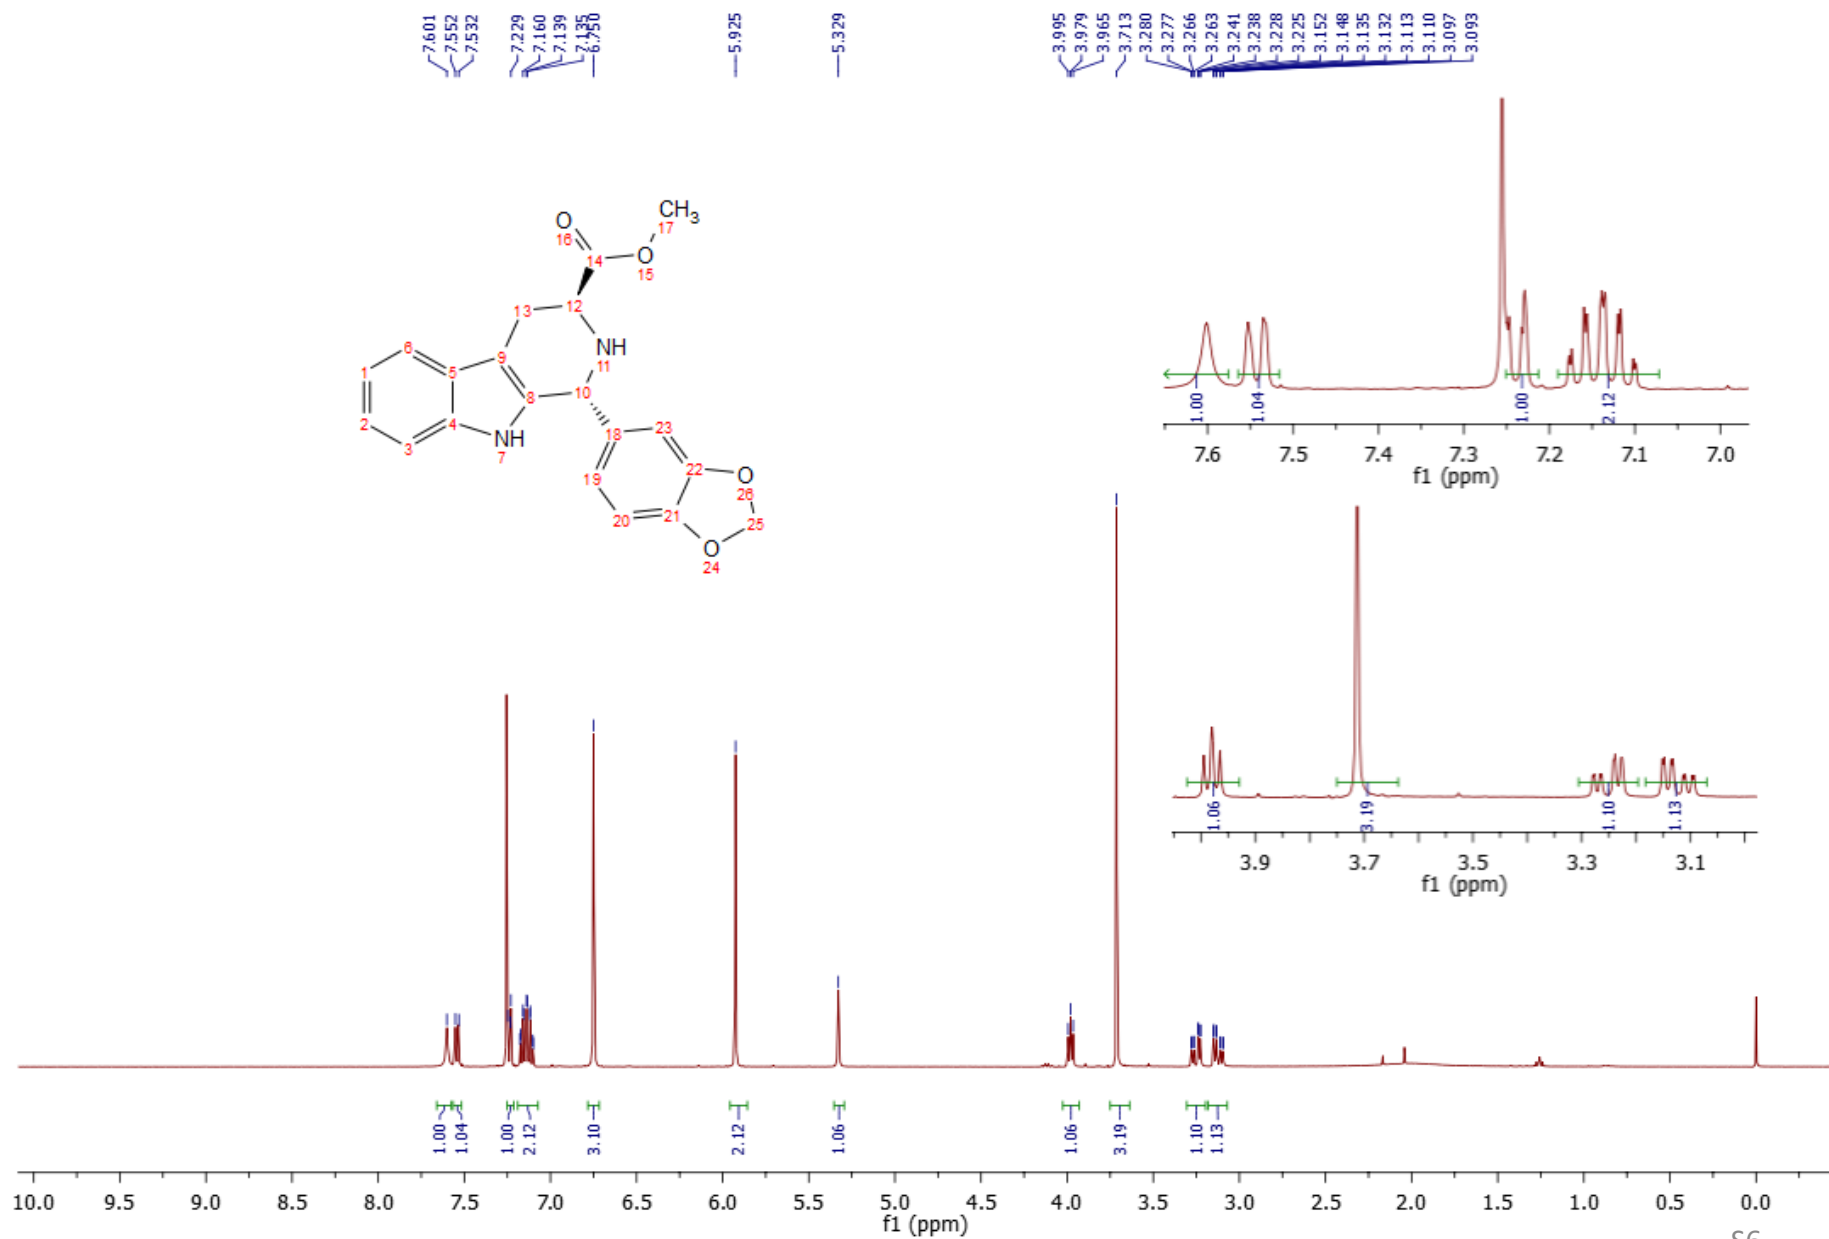

Figure S5: FT-IR (Neat): 9a

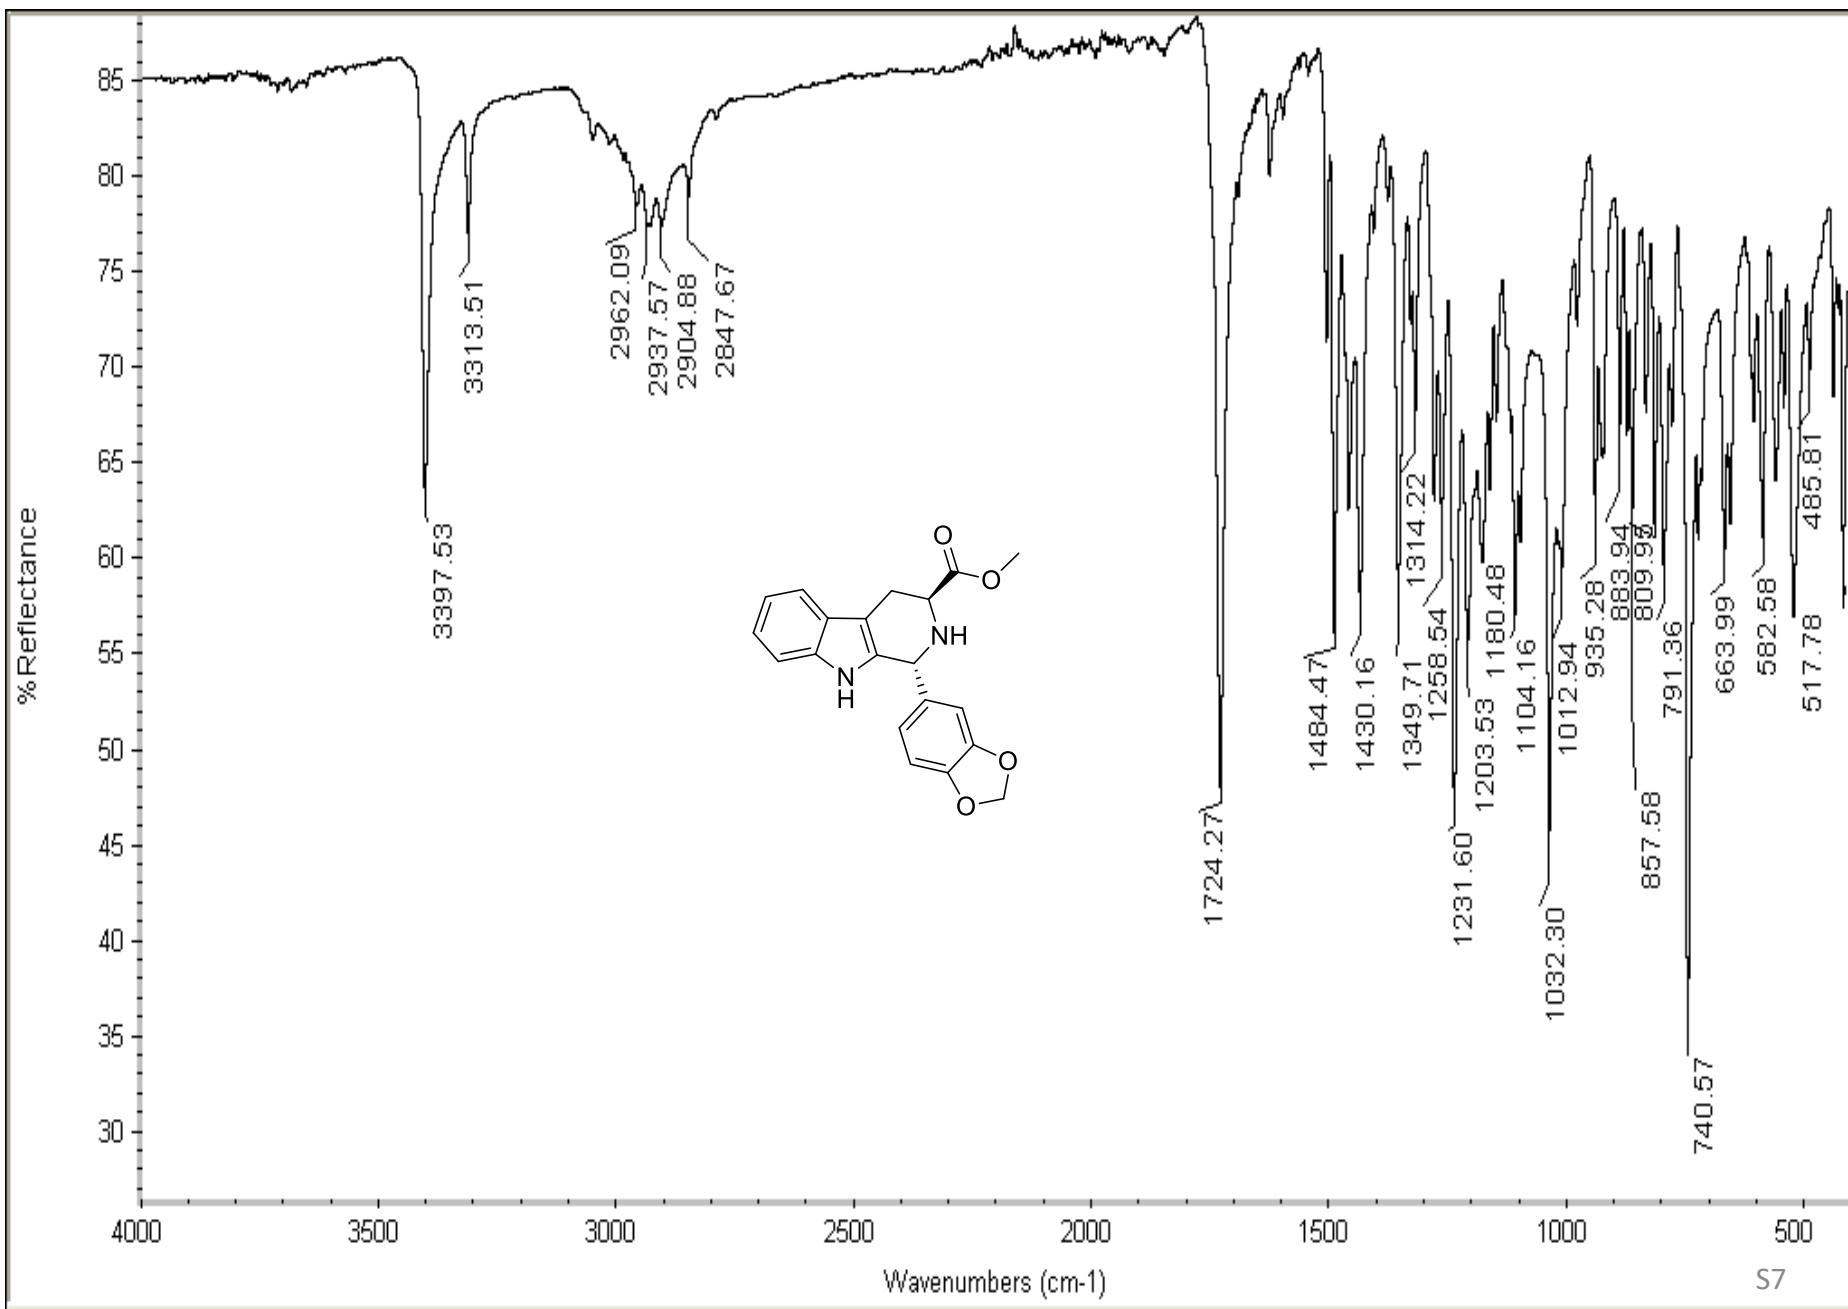

Figure S6: LC-MS: 9a

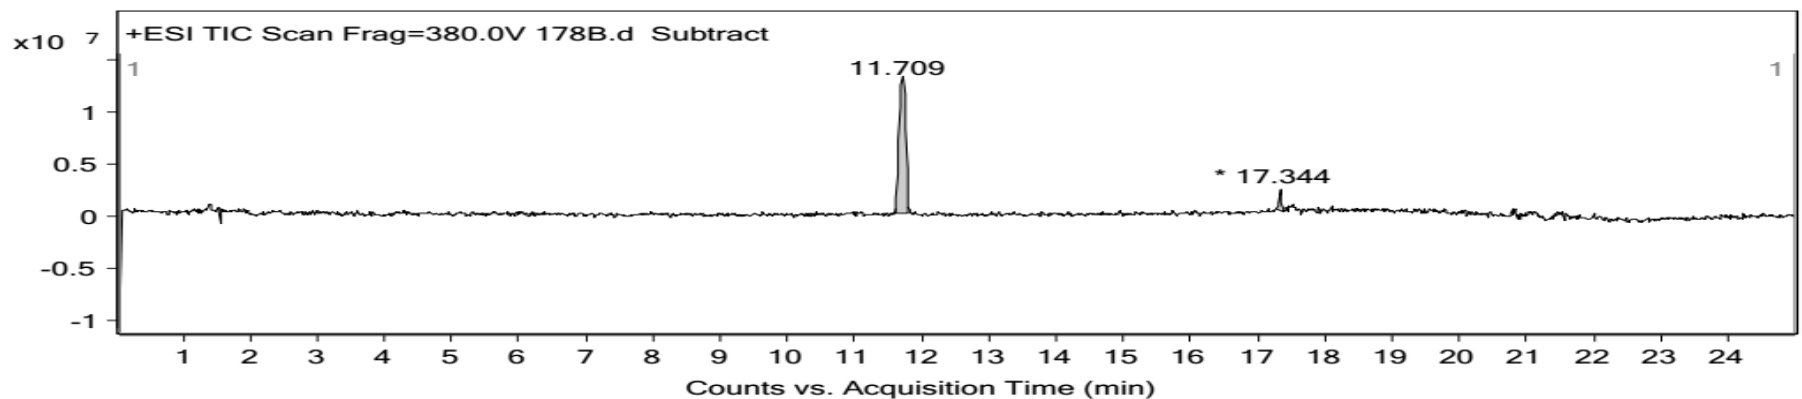

Signal DAD1 B, Sig=280,4 Ref=360,100 (PU\PU Sequence 2018-04-17 21-01-47\RS-178B.D) - DAD1

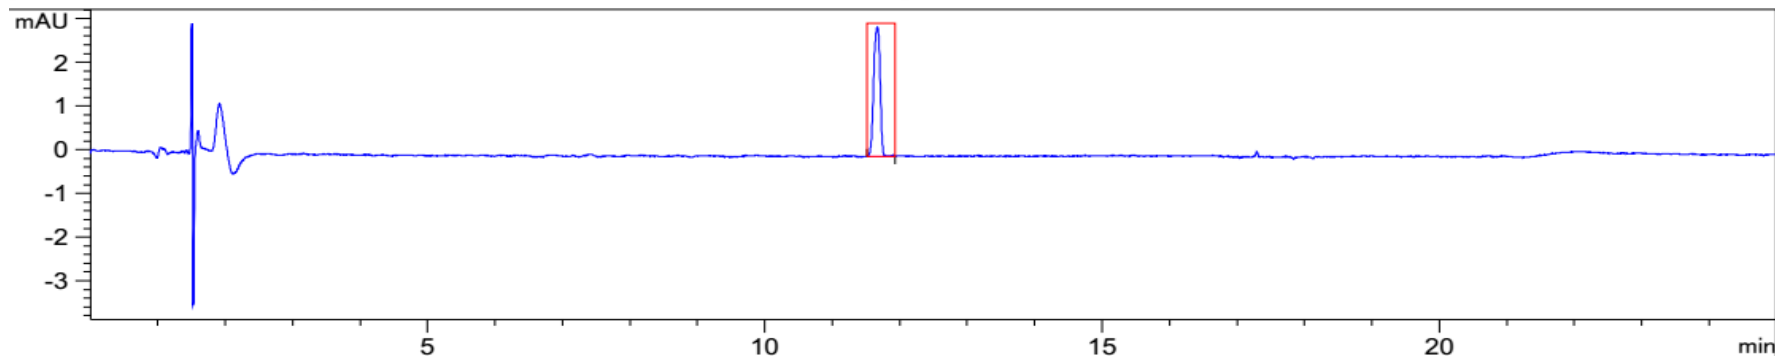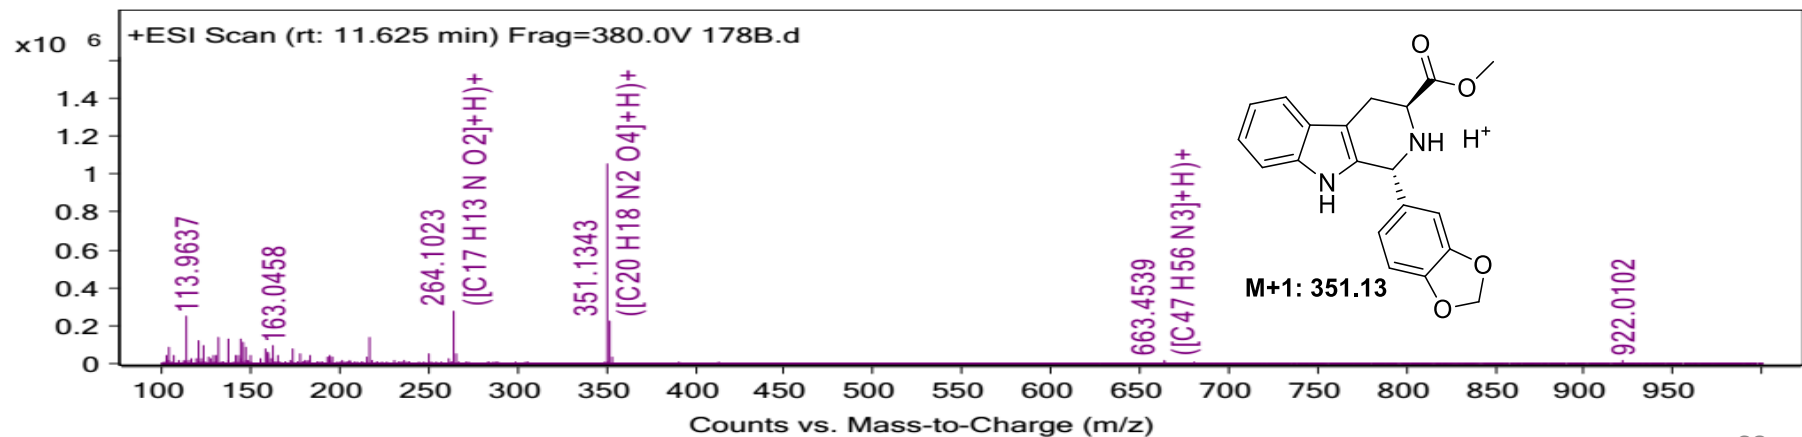



Figure S7:  $^1\text{H}$  NMR (400 MHz): 8b  $\text{CDCl}_3$

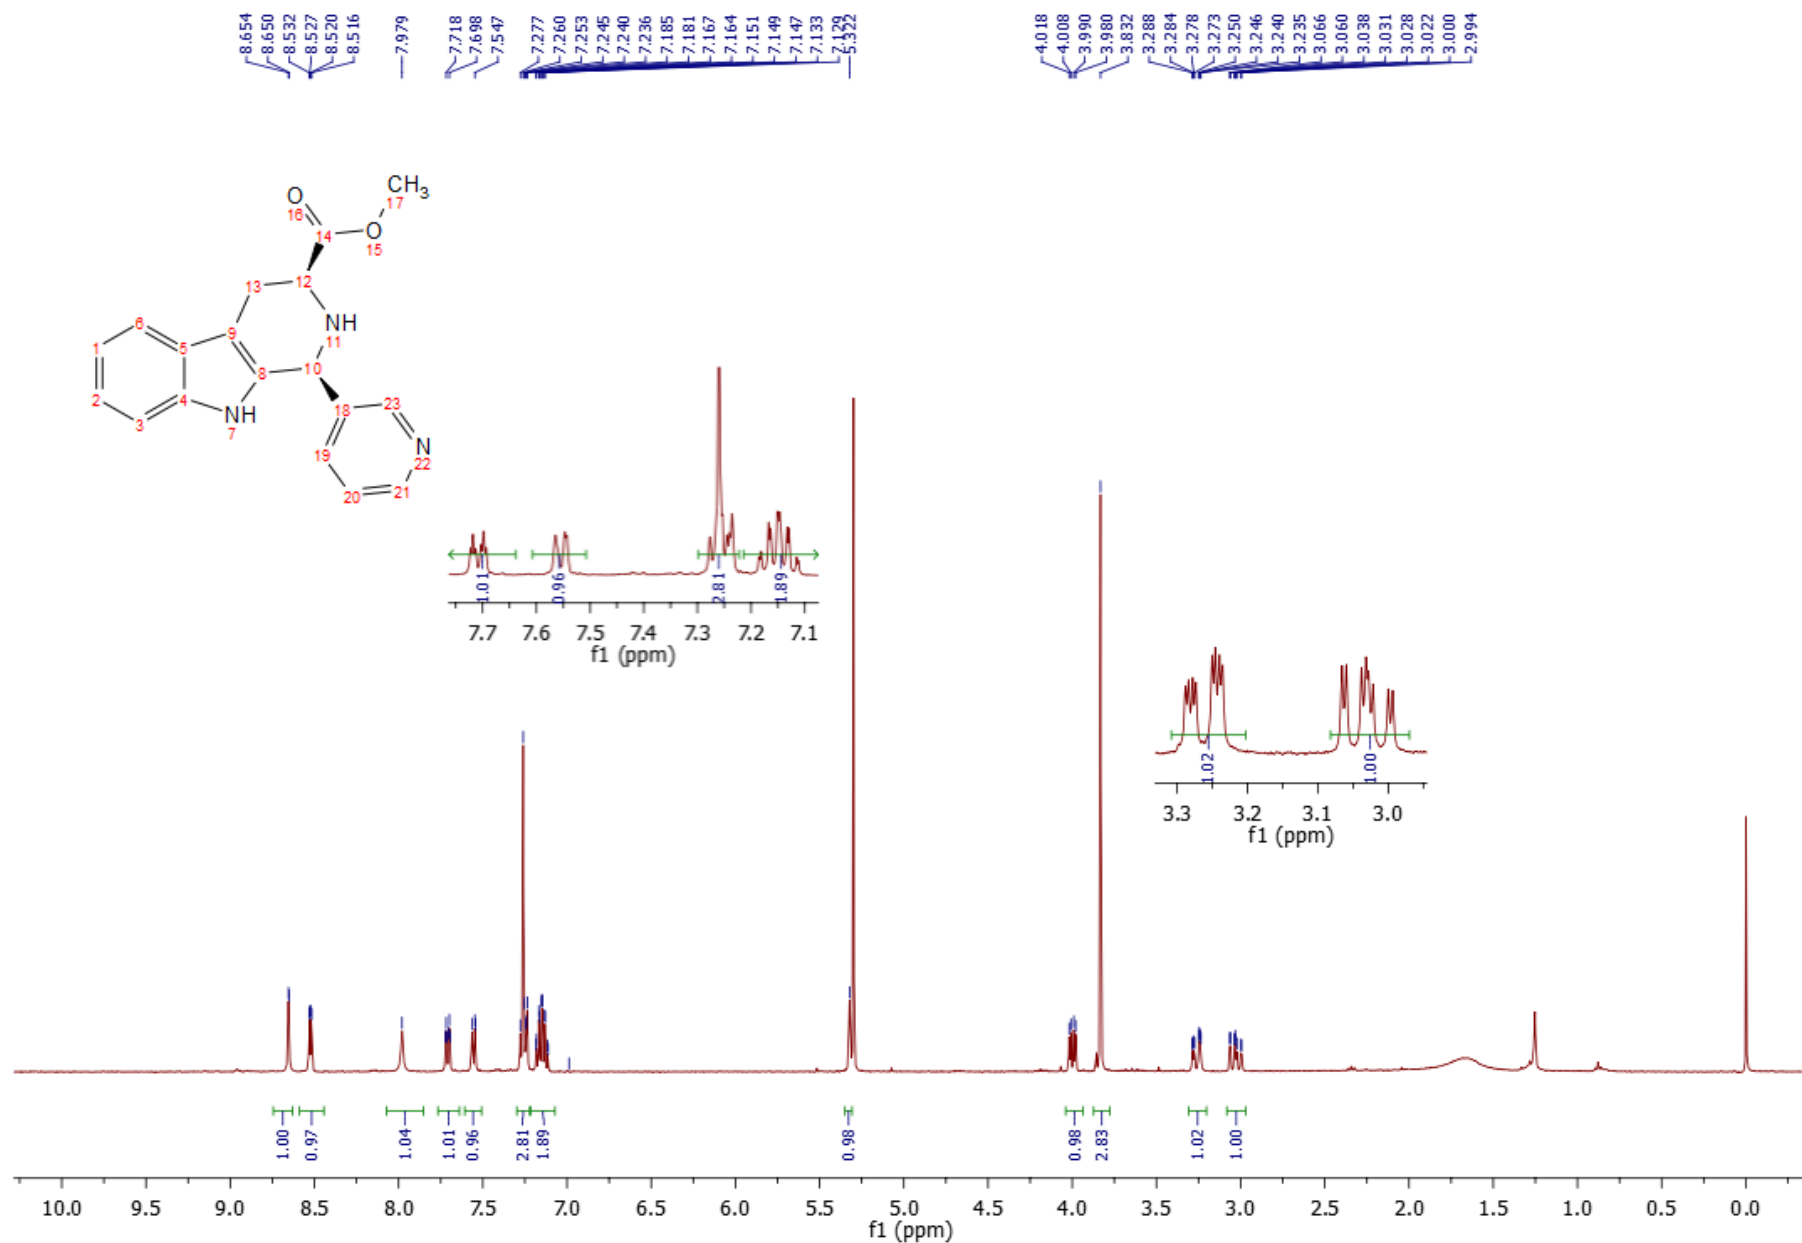

Figure S8: FT-IR (Neat): 8b

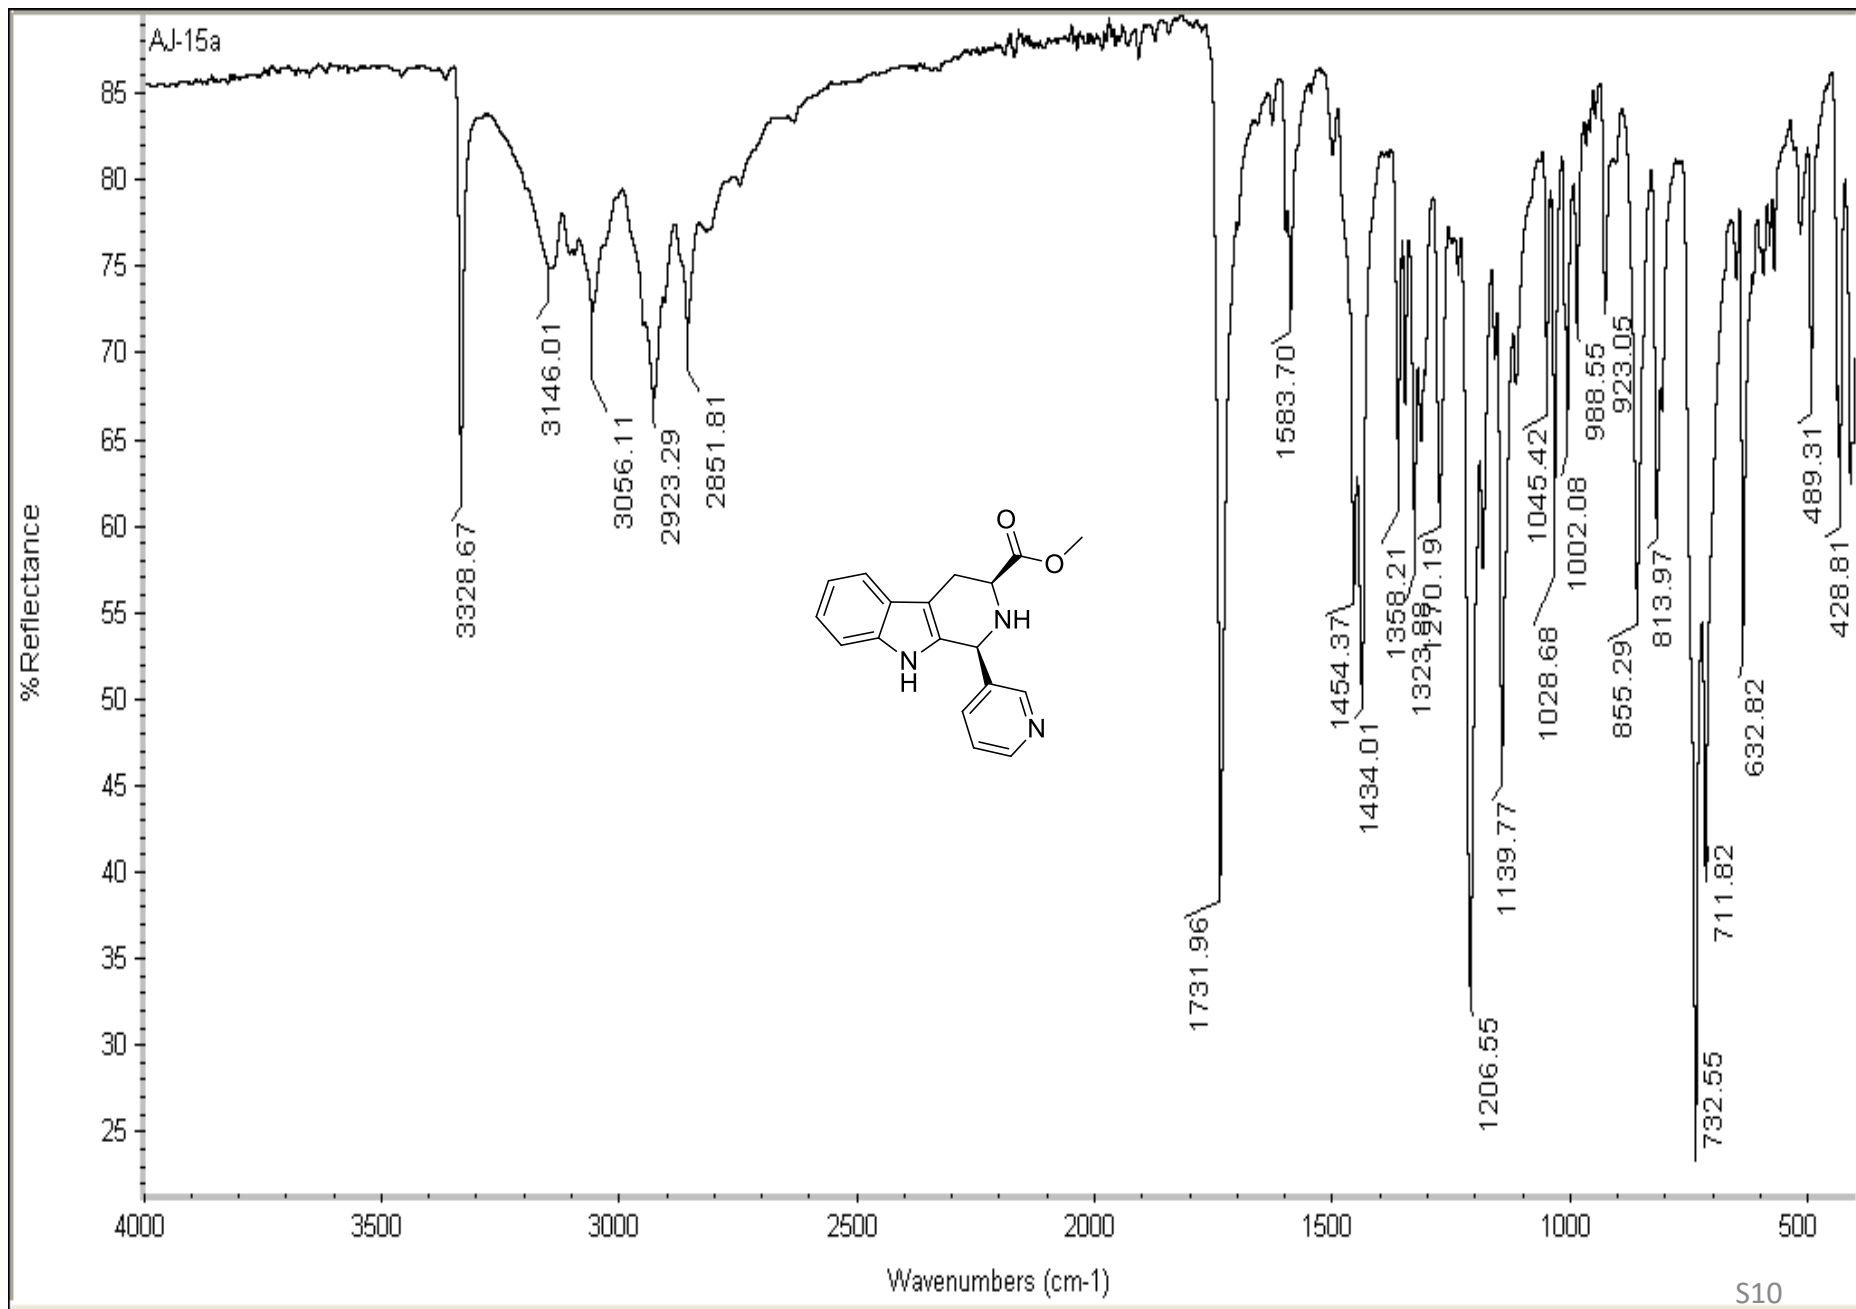

Figure S9: LC-MS: 8b

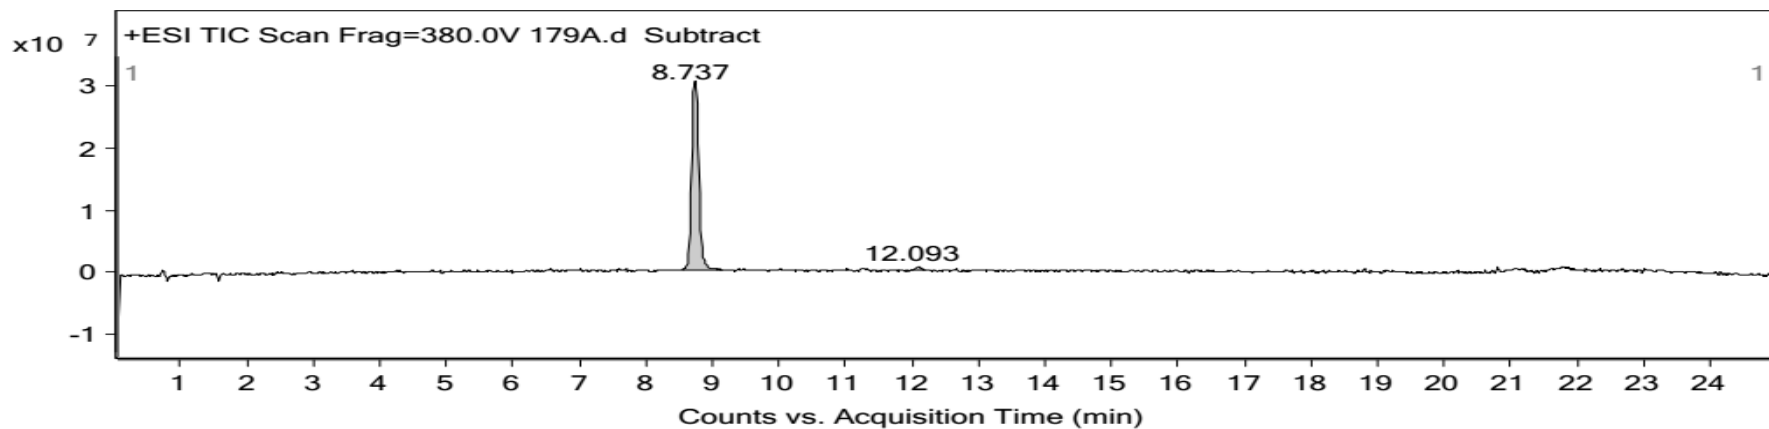

Signal DAD1 B, Sig=280,4 Ref=360,100 (PU\PU Sequence 2018-04-17 21-01-47\RS-179A.D) - DAD1

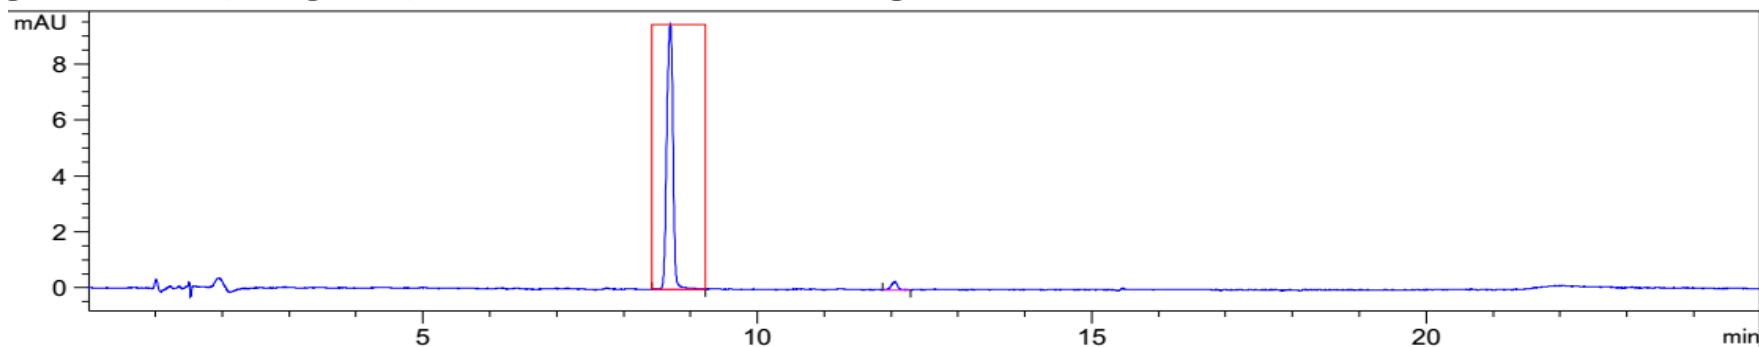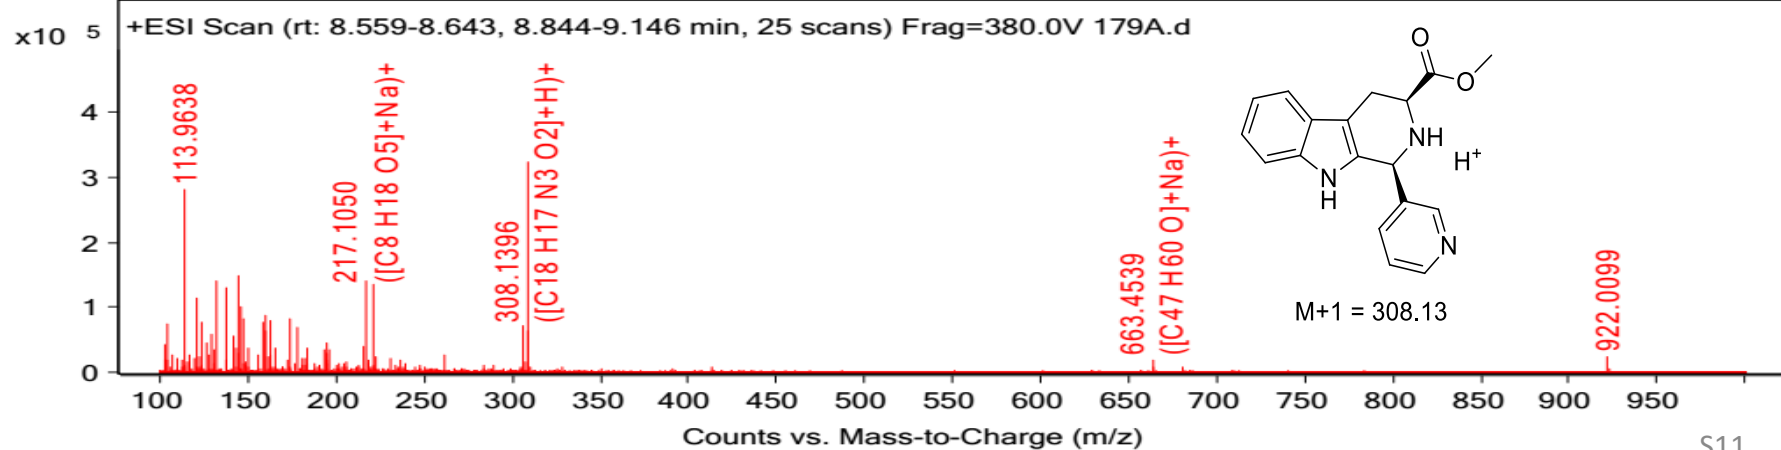

Figure S10:  $^1\text{H}$  NMR (400 MHz): 9b  $\text{CDCl}_3$

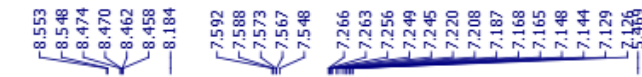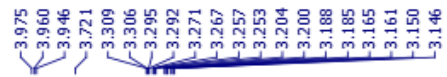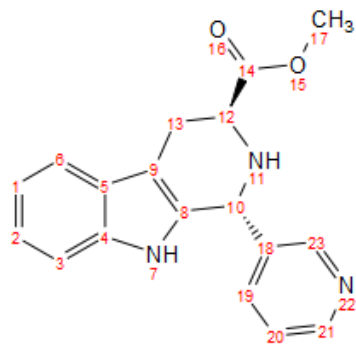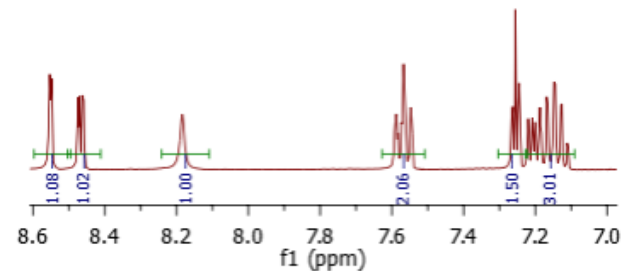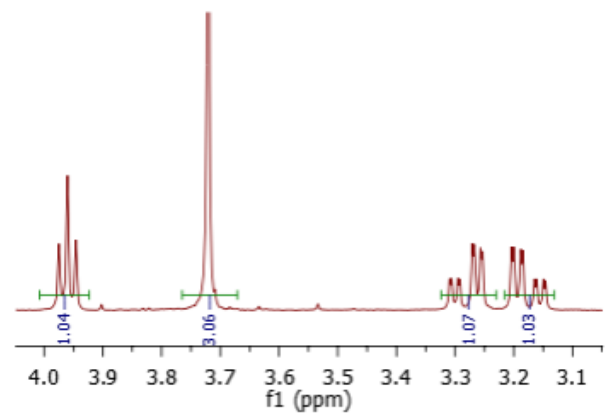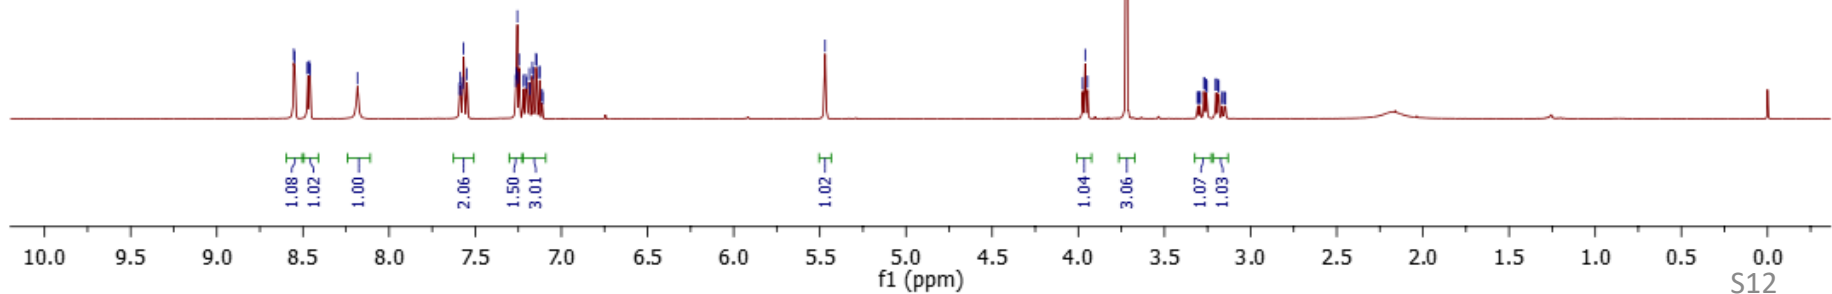

Figure S11: FT-IR (Neat): 9b

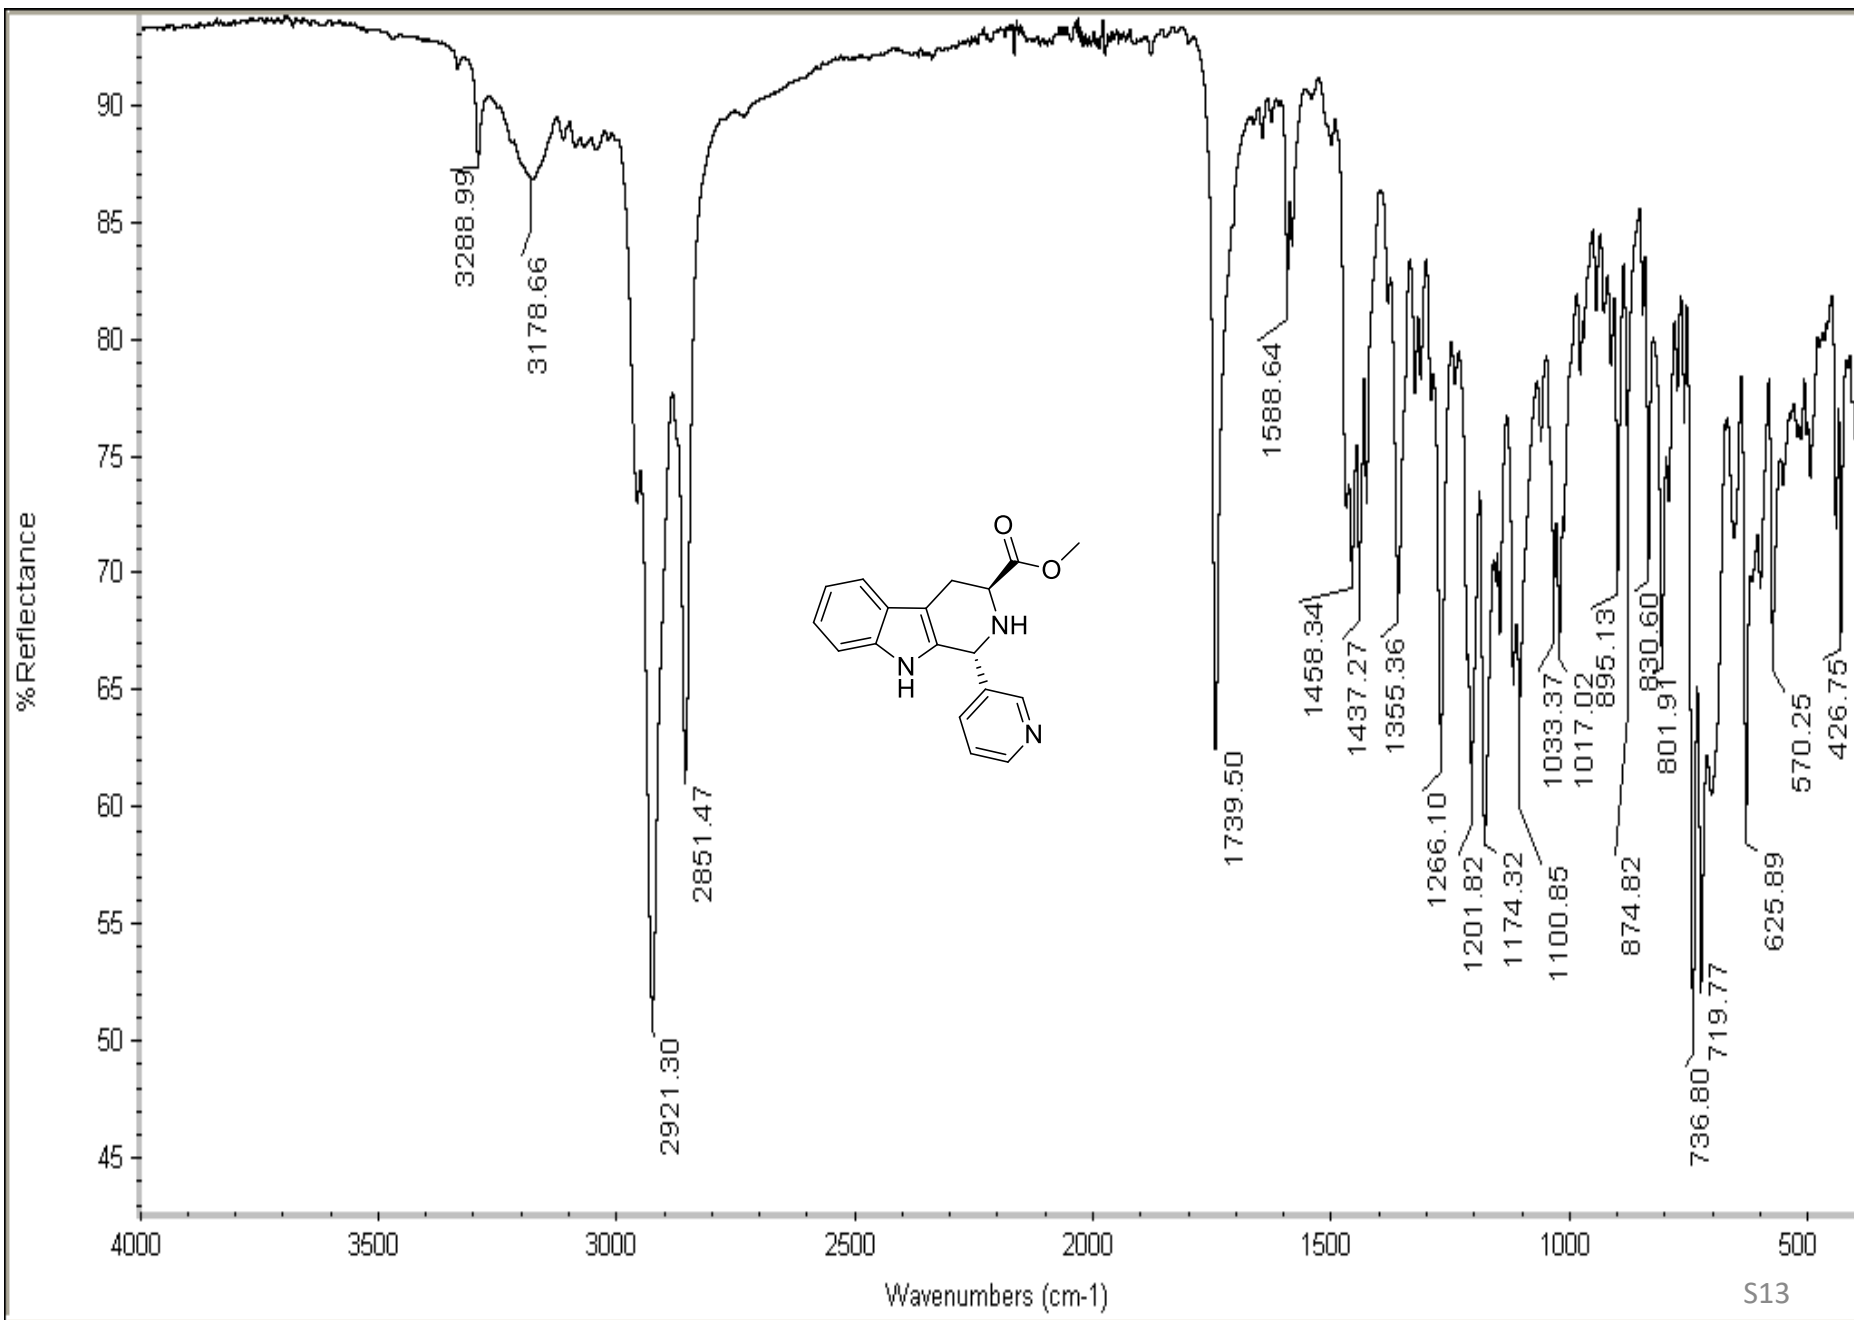

Figure S12: LC-MS: 9b

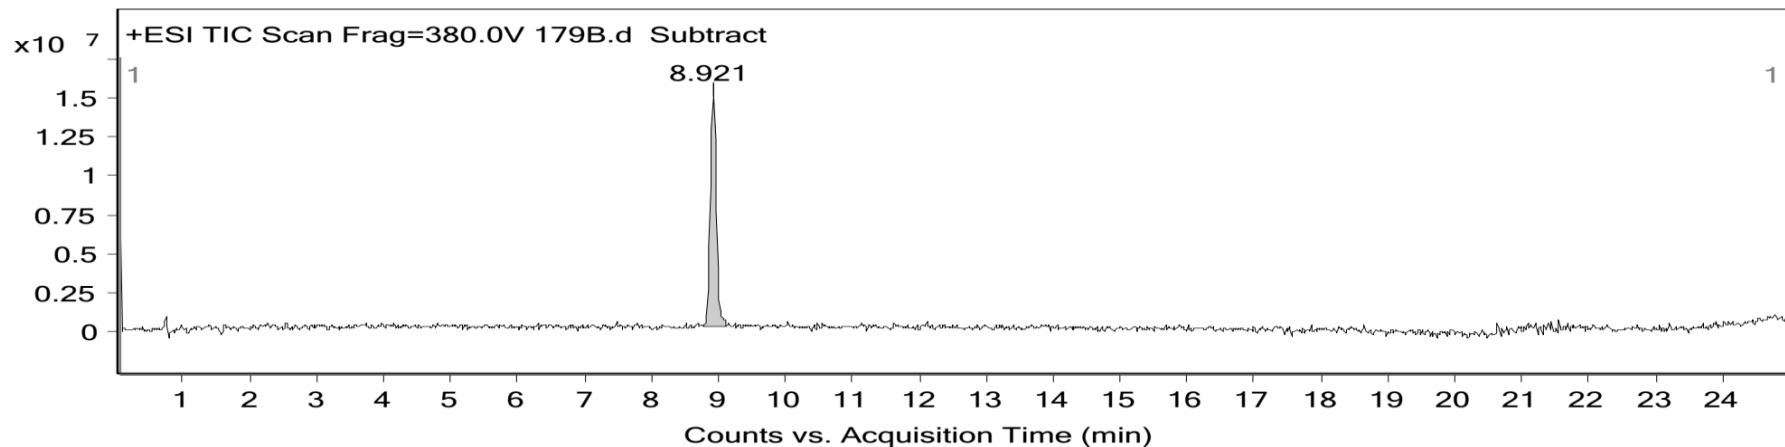

Signal DAD1 B, Sig=280,4 Ref=360,100 (PU\PU Sequence 2018-04-17 21-01-47\RS-179B.D) - DAD1

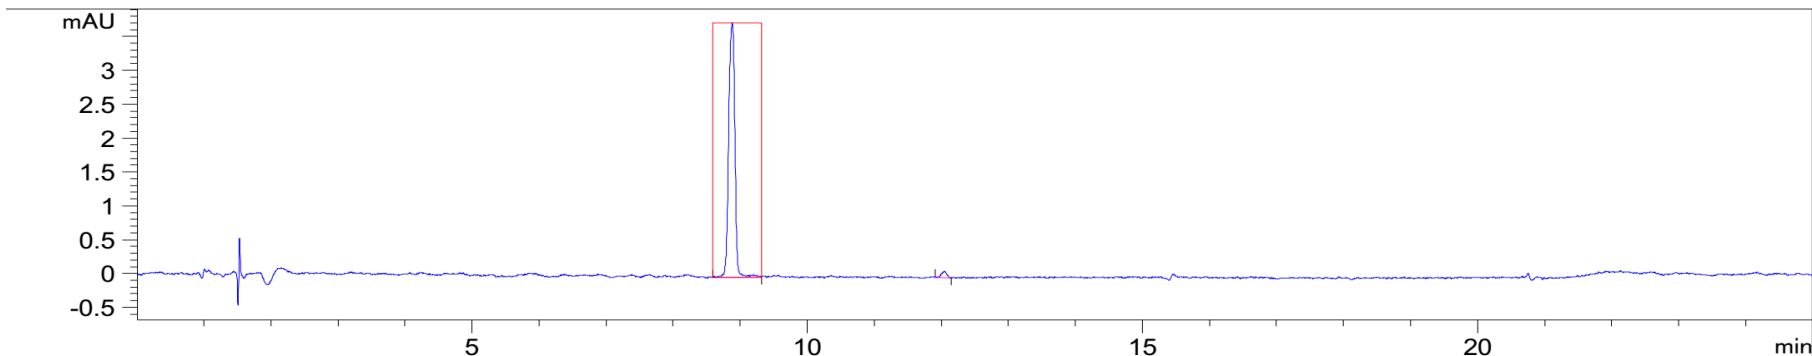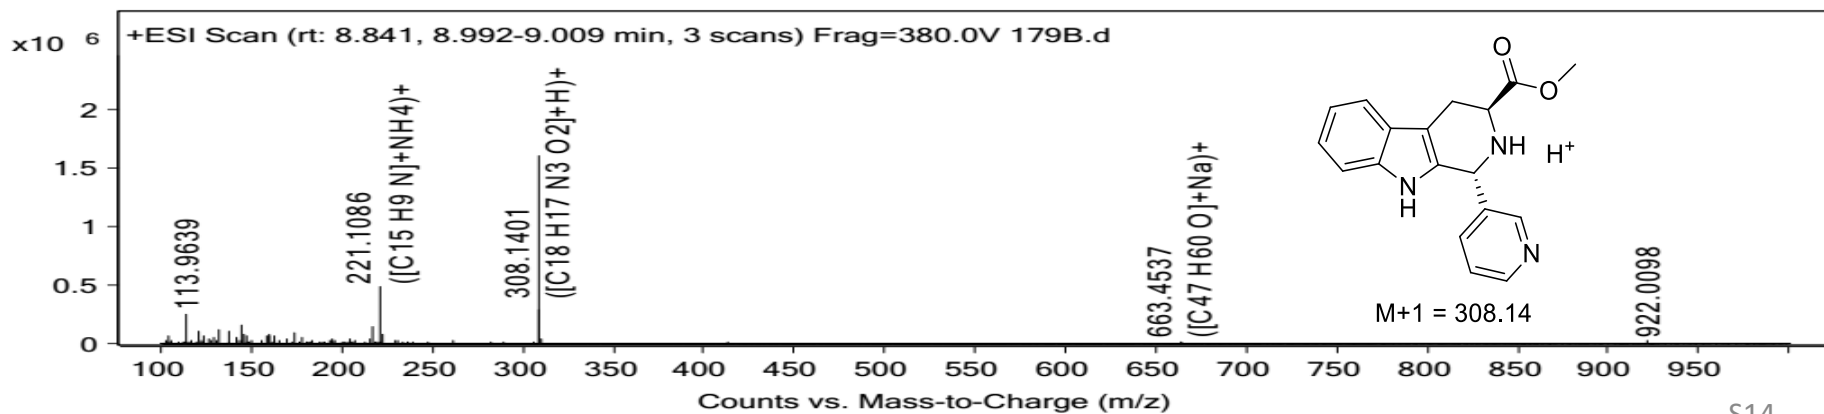

Figure S13:  $^1\text{H}$  NMR (400 MHz): 8c  $\text{CDCl}_3$

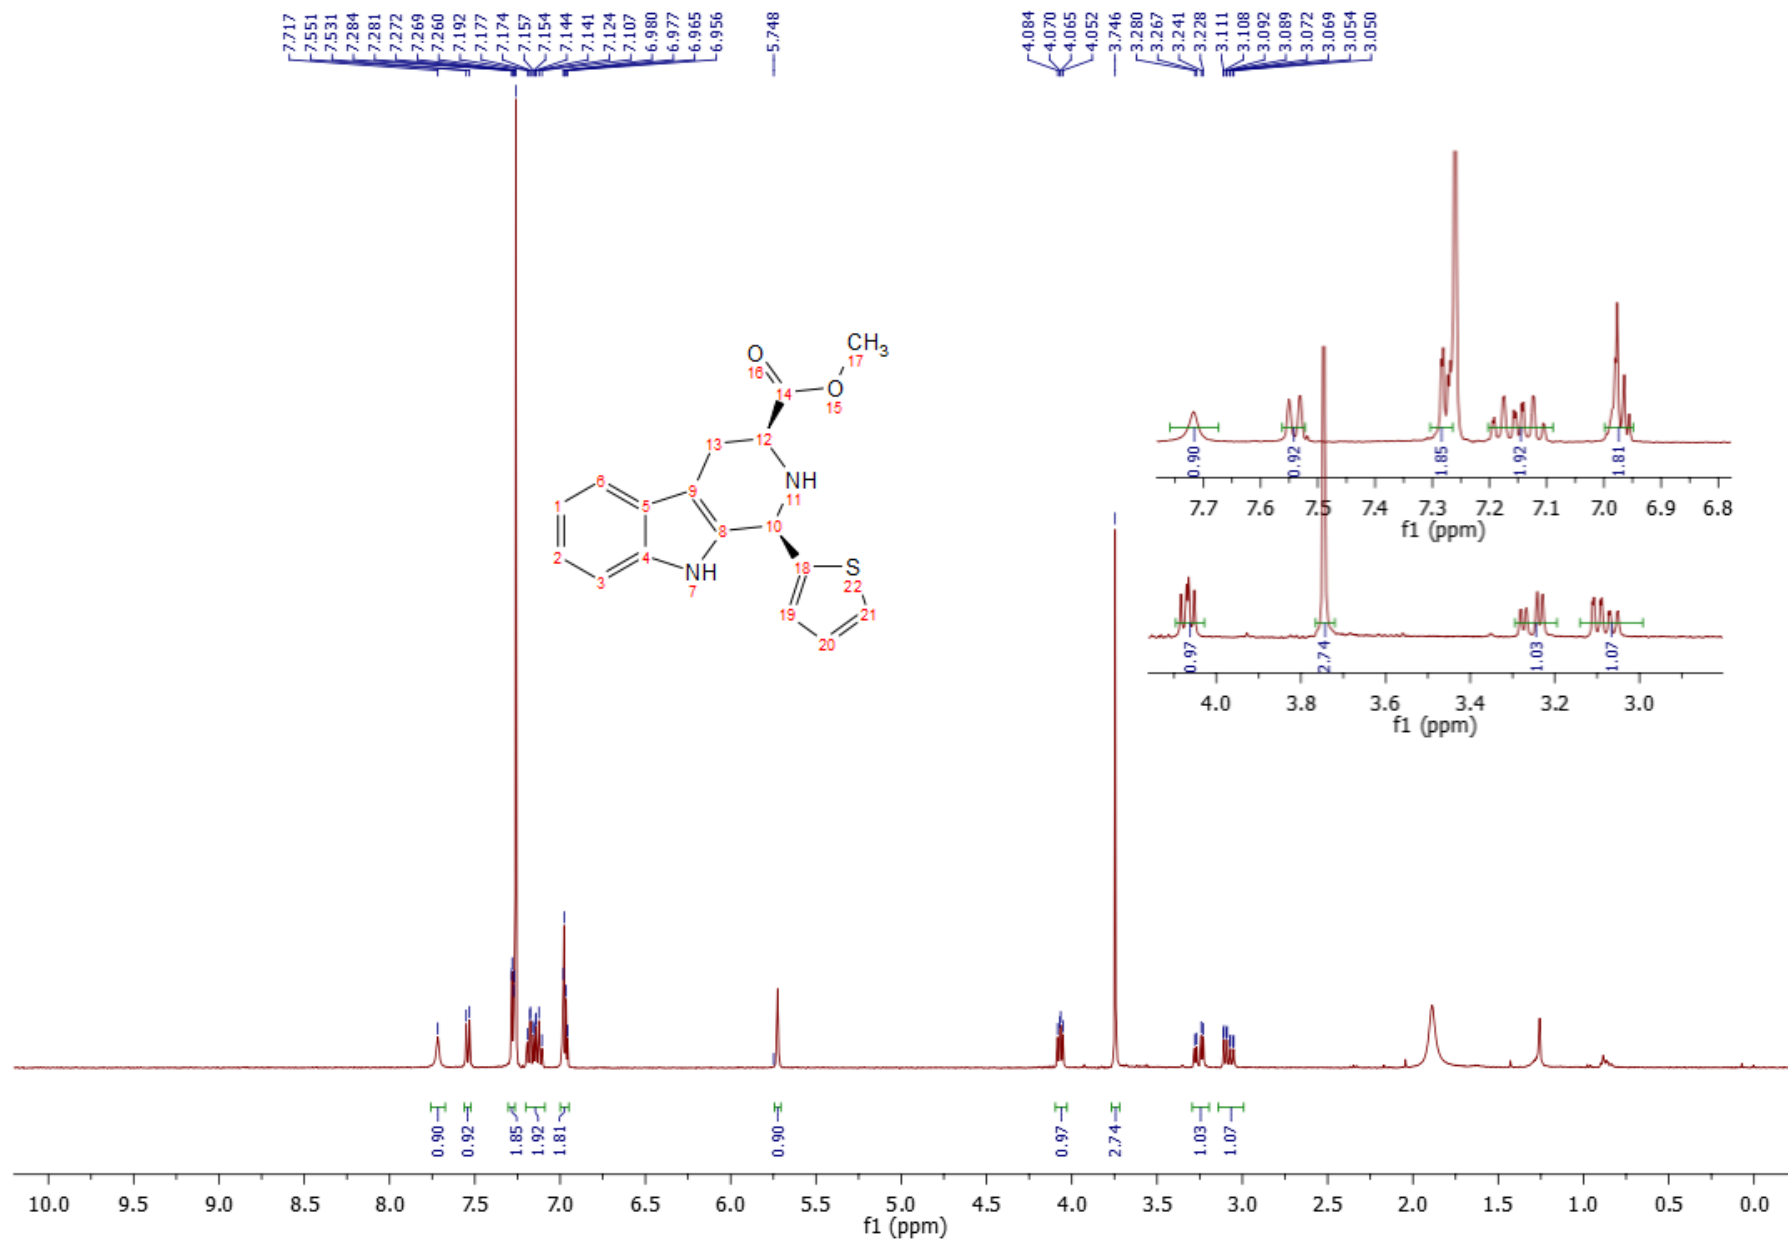

Figure S14: FT-IR (Neat): 8c

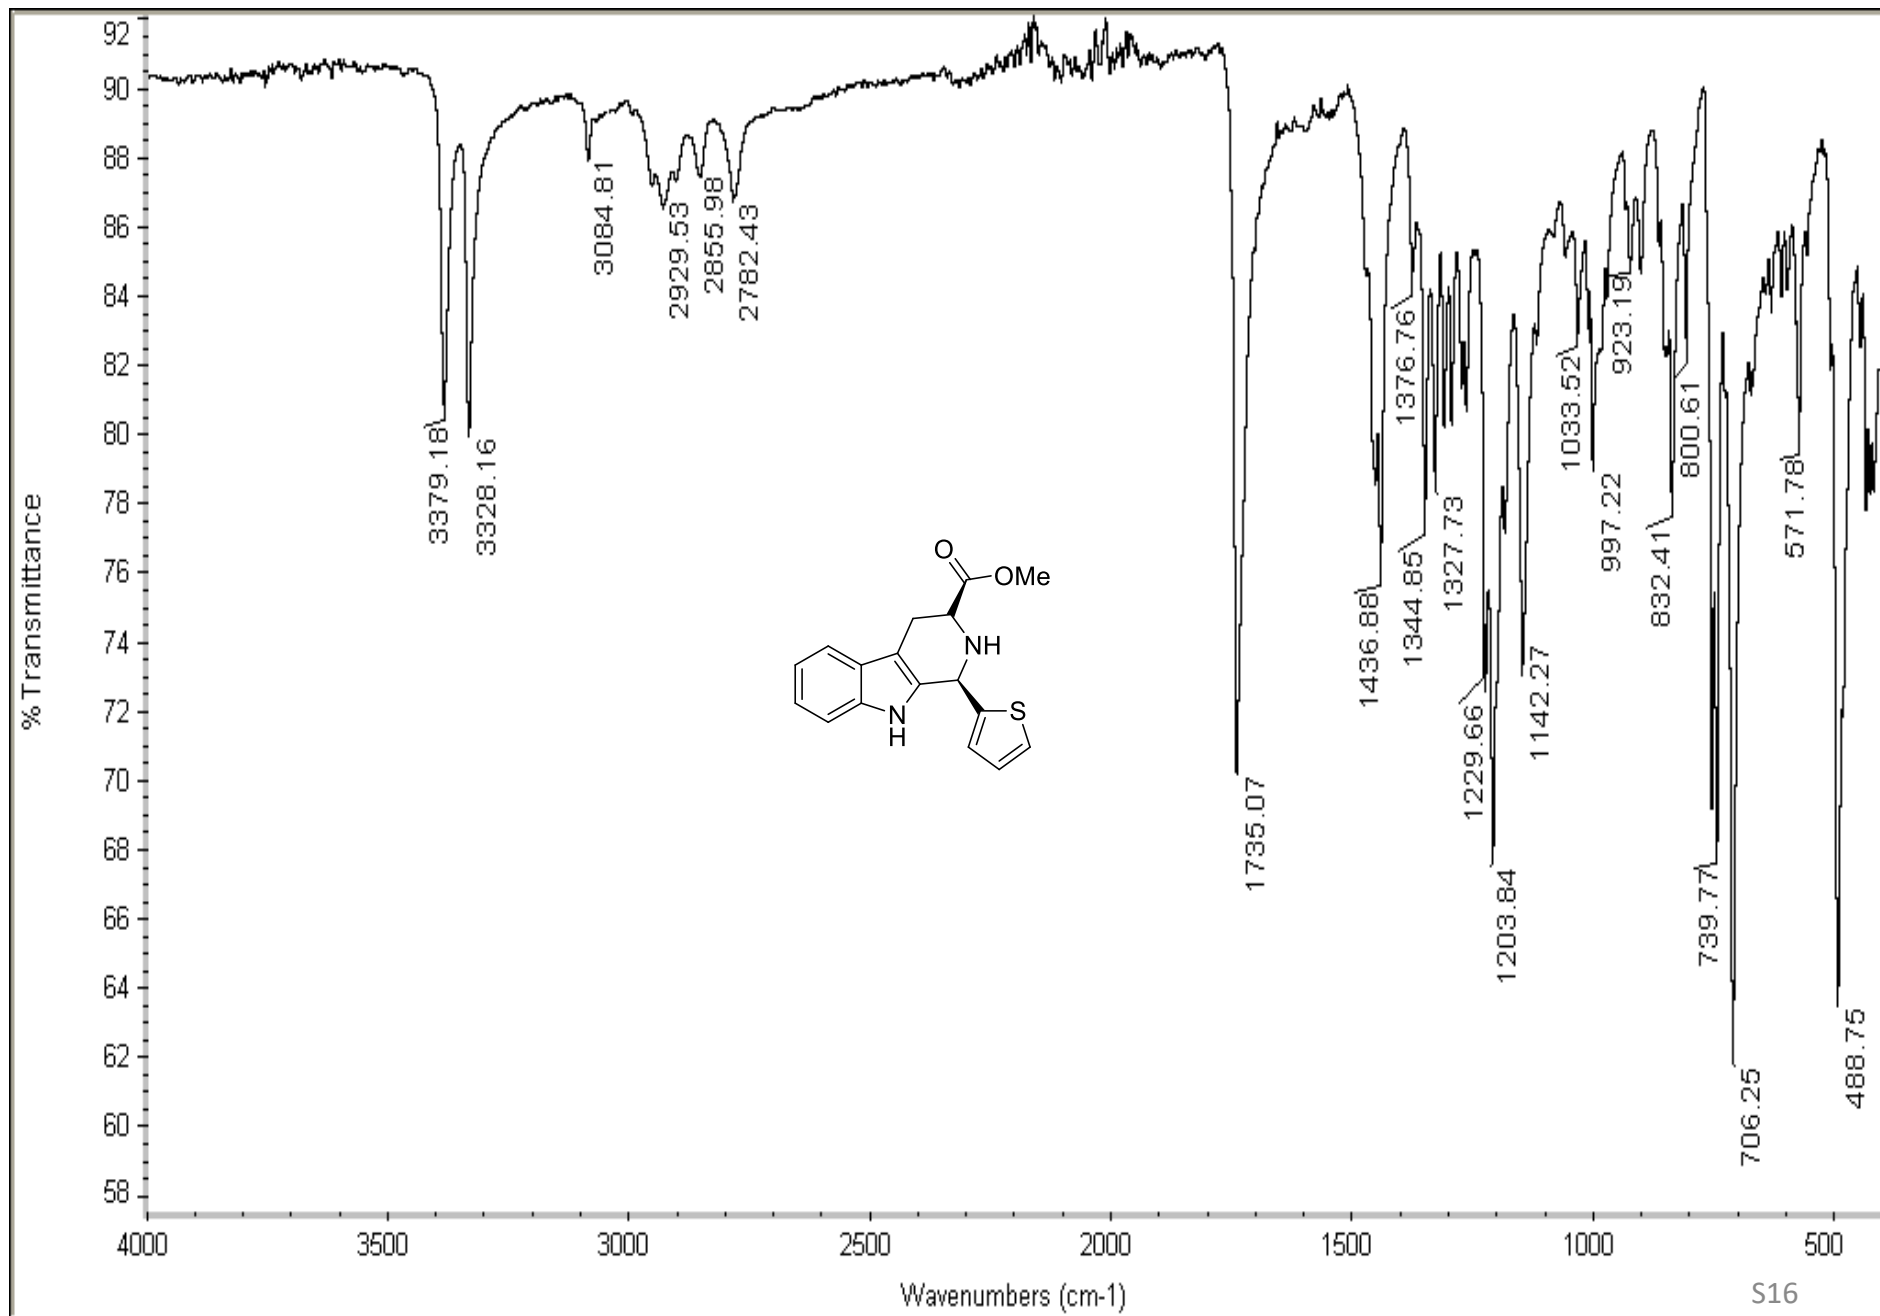



Figure S15: LC-MS: 8c

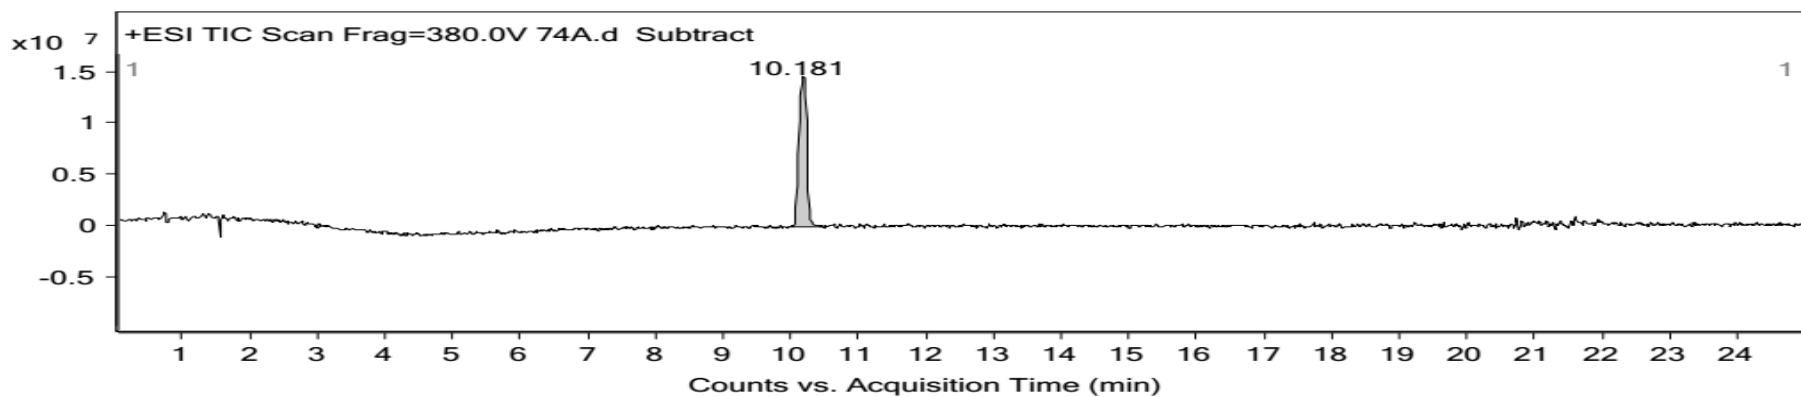

Signal DAD1 B, Sig=280,4 Ref=360,100 (PU\PU Sequence 2018-04-17 21-01-47\RS-74A.D) - DAD1 I

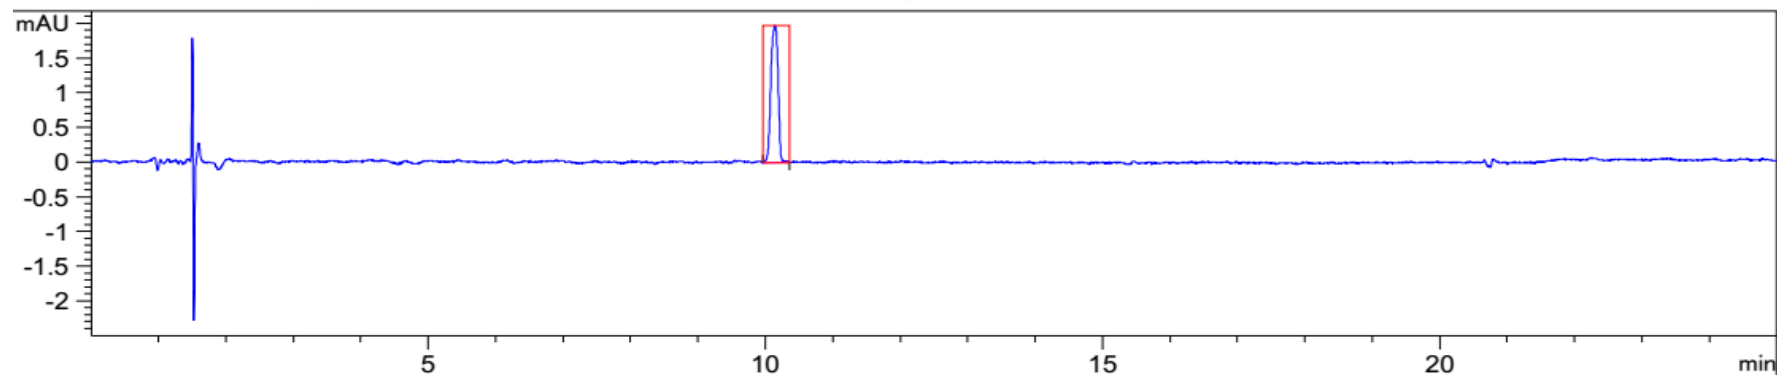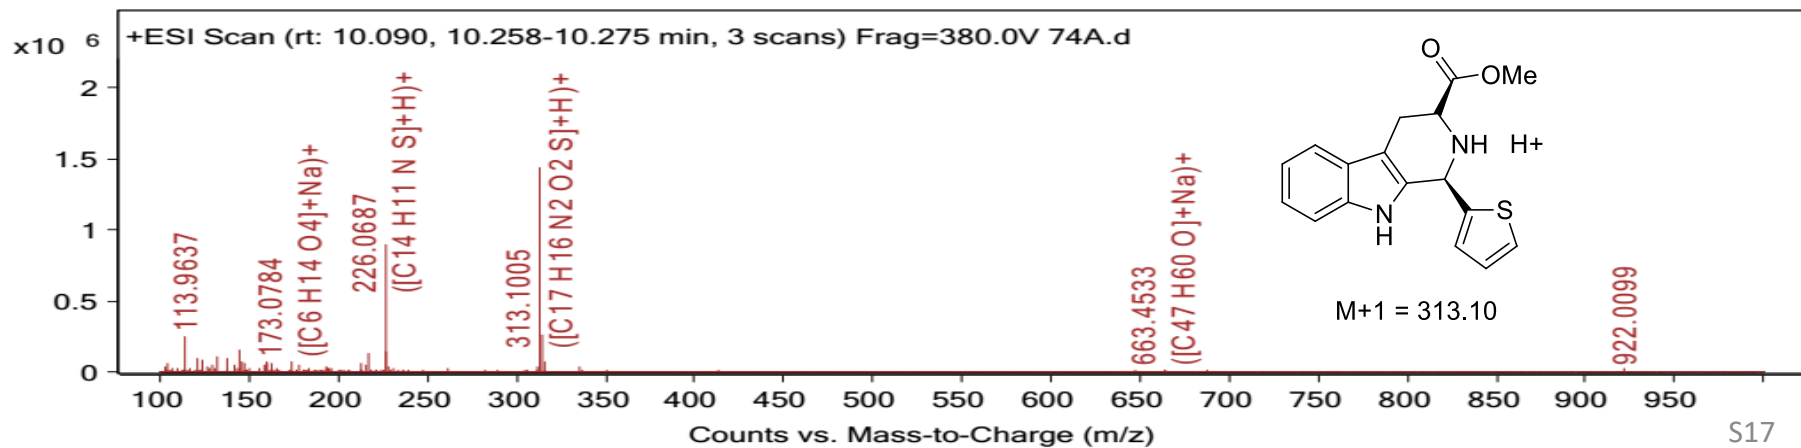

Figure S16:  $^1\text{H}$  NMR (400 MHz): 9c  $\text{CDCl}_3$

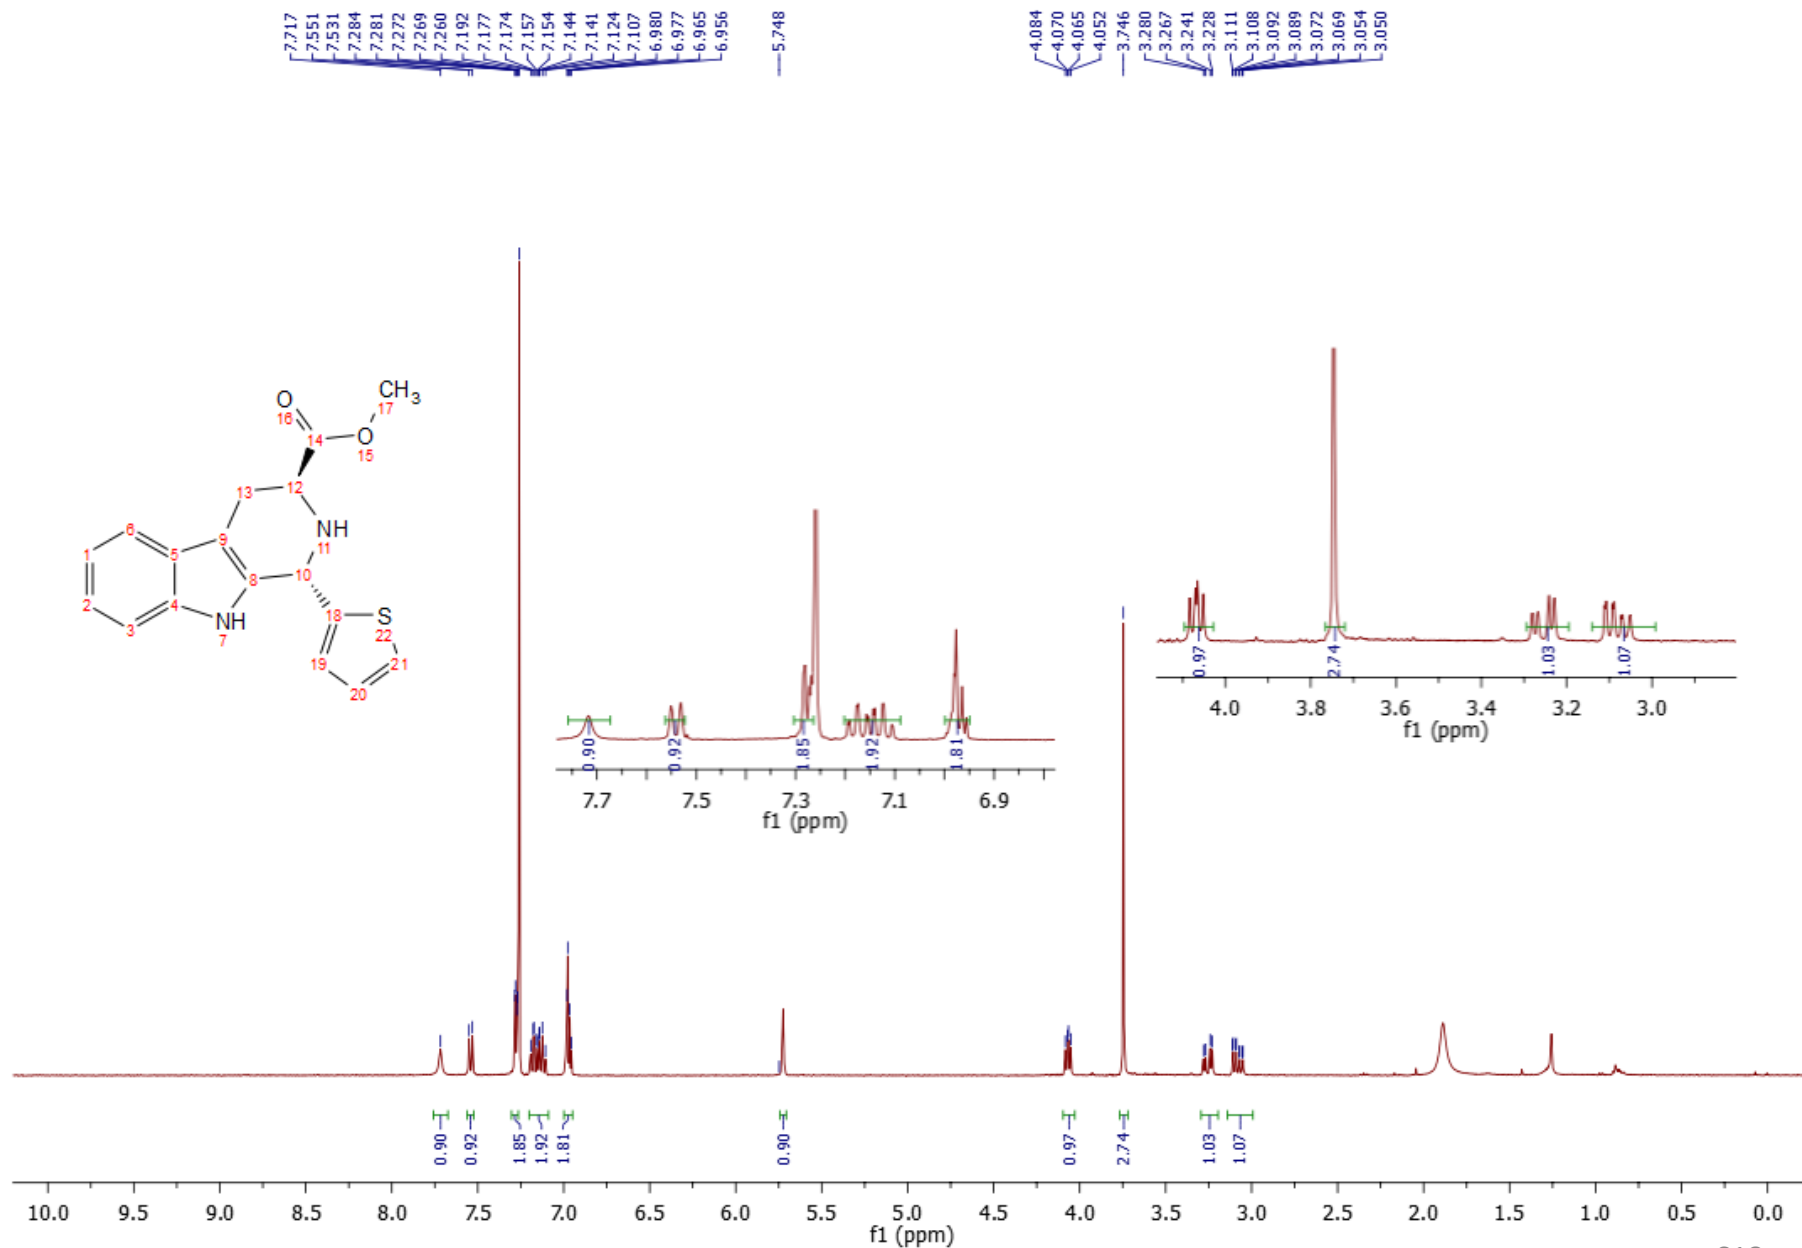

Figure S17: FT-IR (Neat): 9c

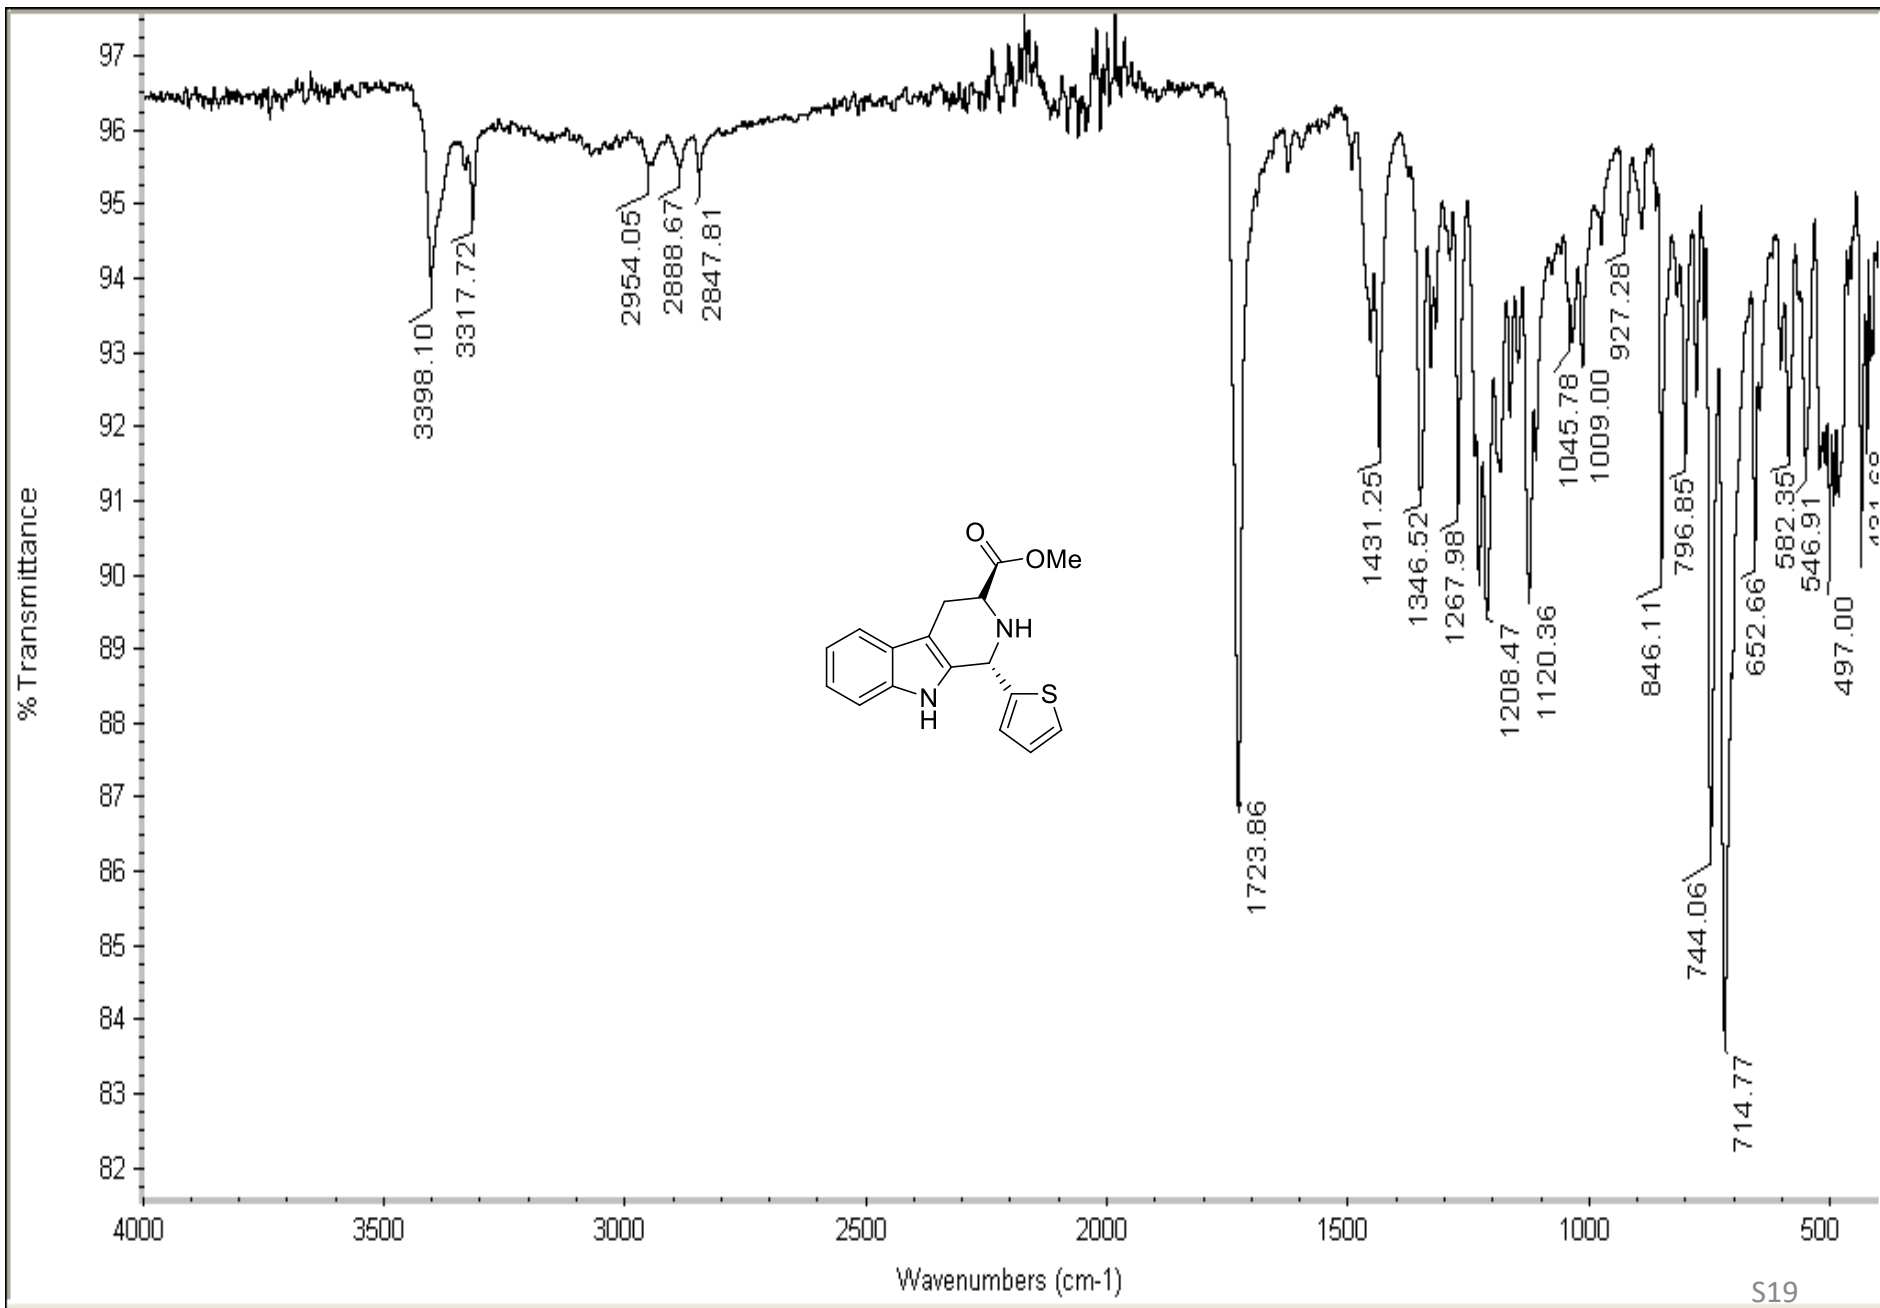

Figure S18: LC-MS: 9c

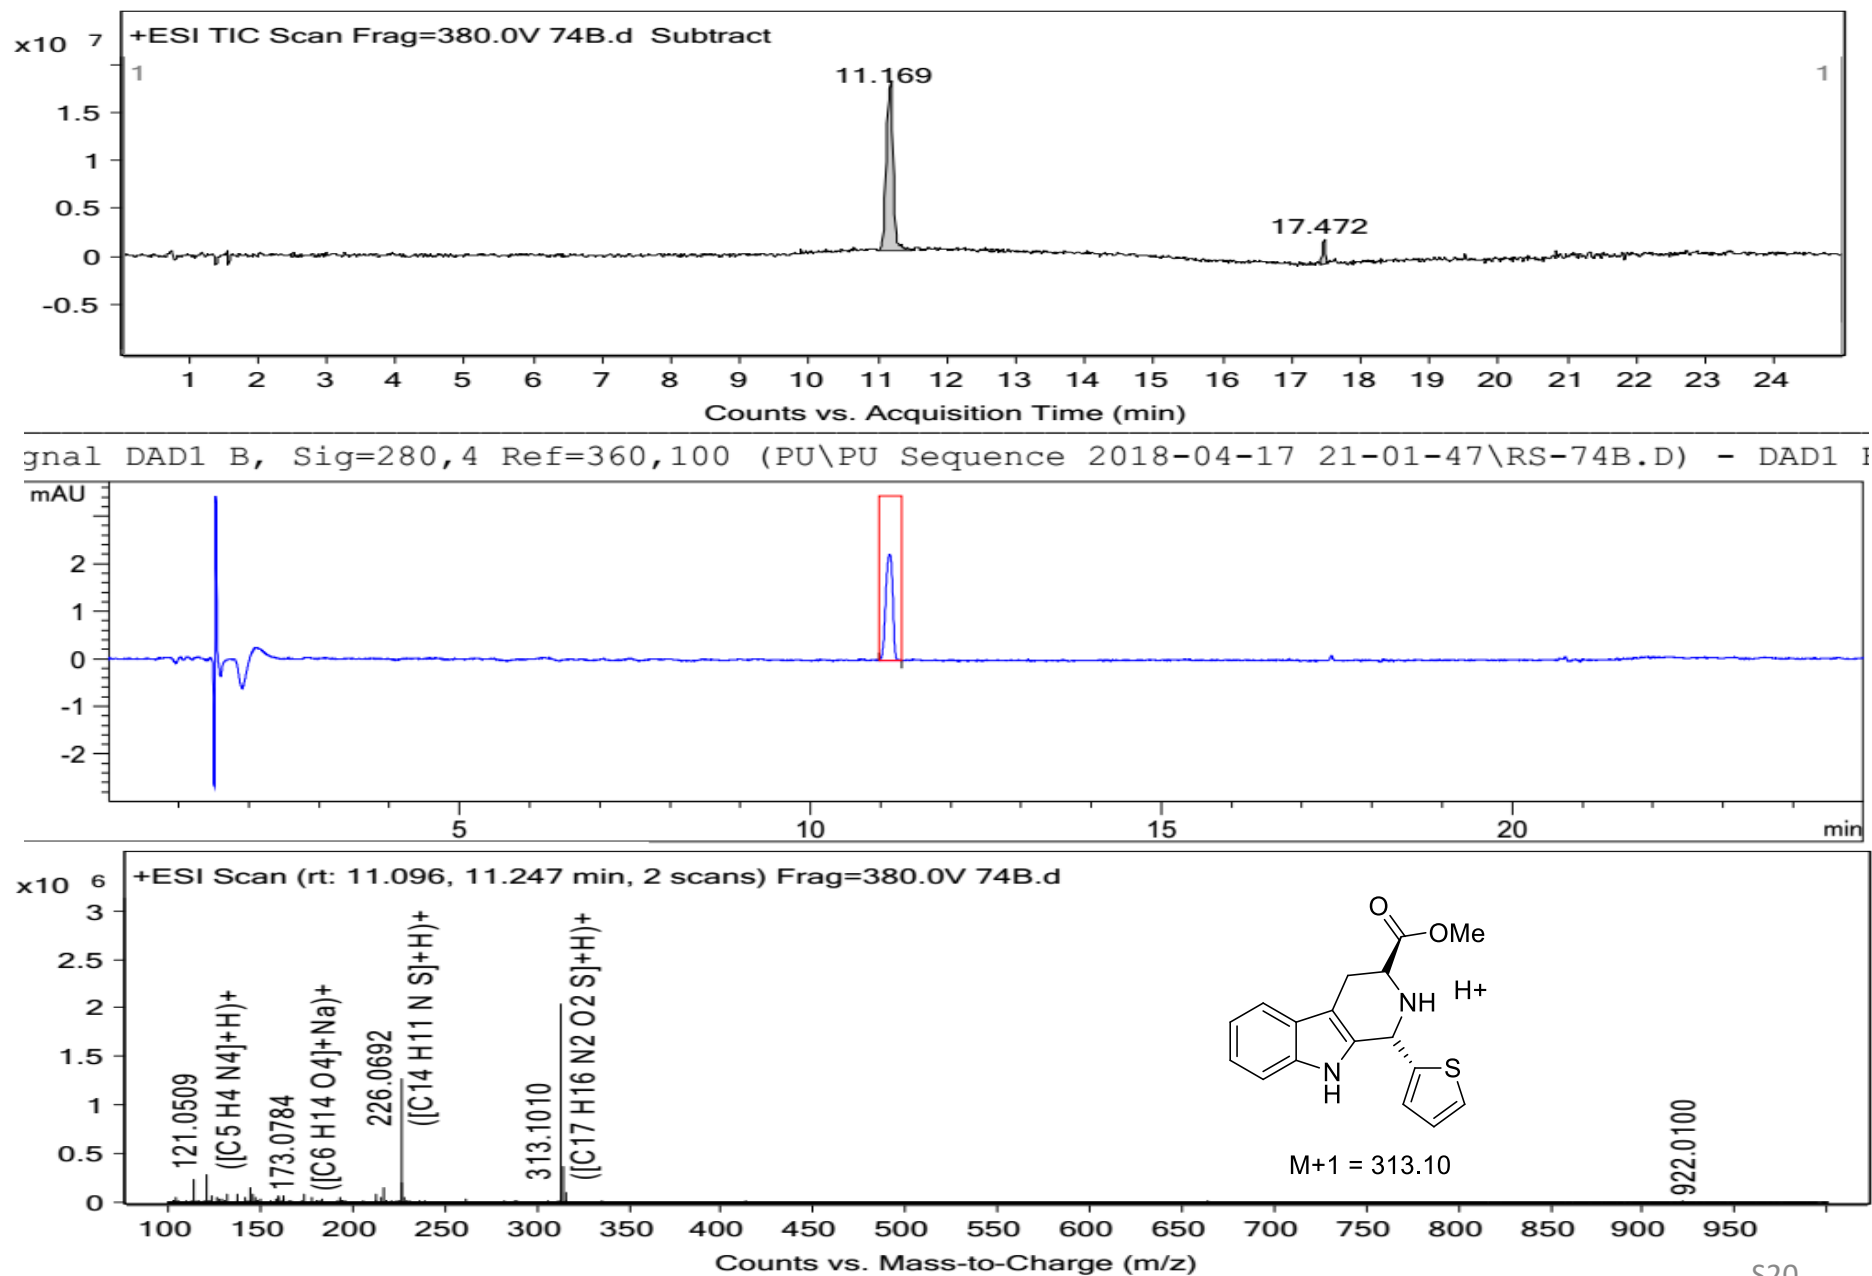

Figure S19:  $^1\text{H}$  NMR (400 MHz): 8d DMSO- $d_6$ + $\text{CDCl}_3$

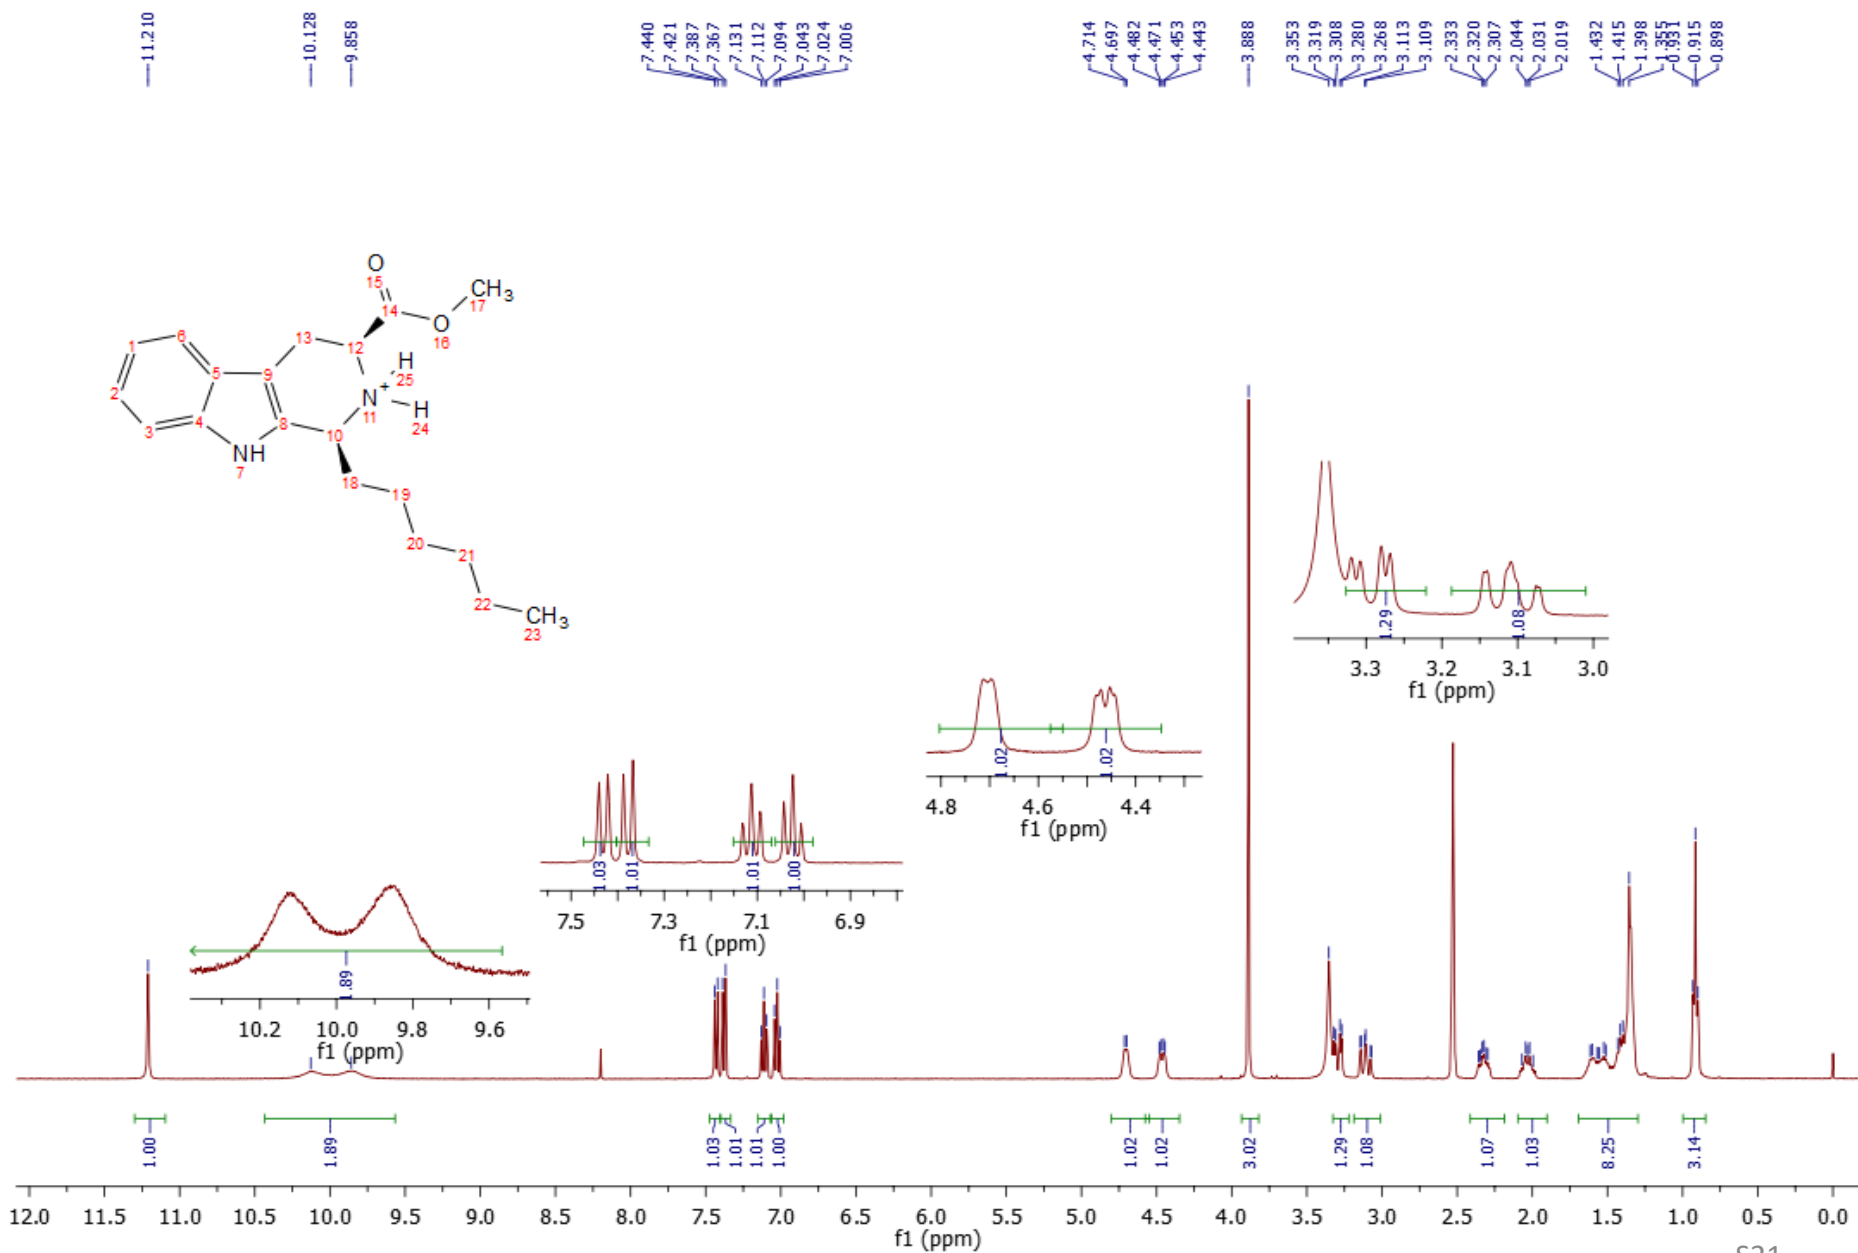

Figure S20:  $^{13}\text{C}$  (100 MHz): 8d DMSO- $d_6$ + $\text{CDCl}_3$

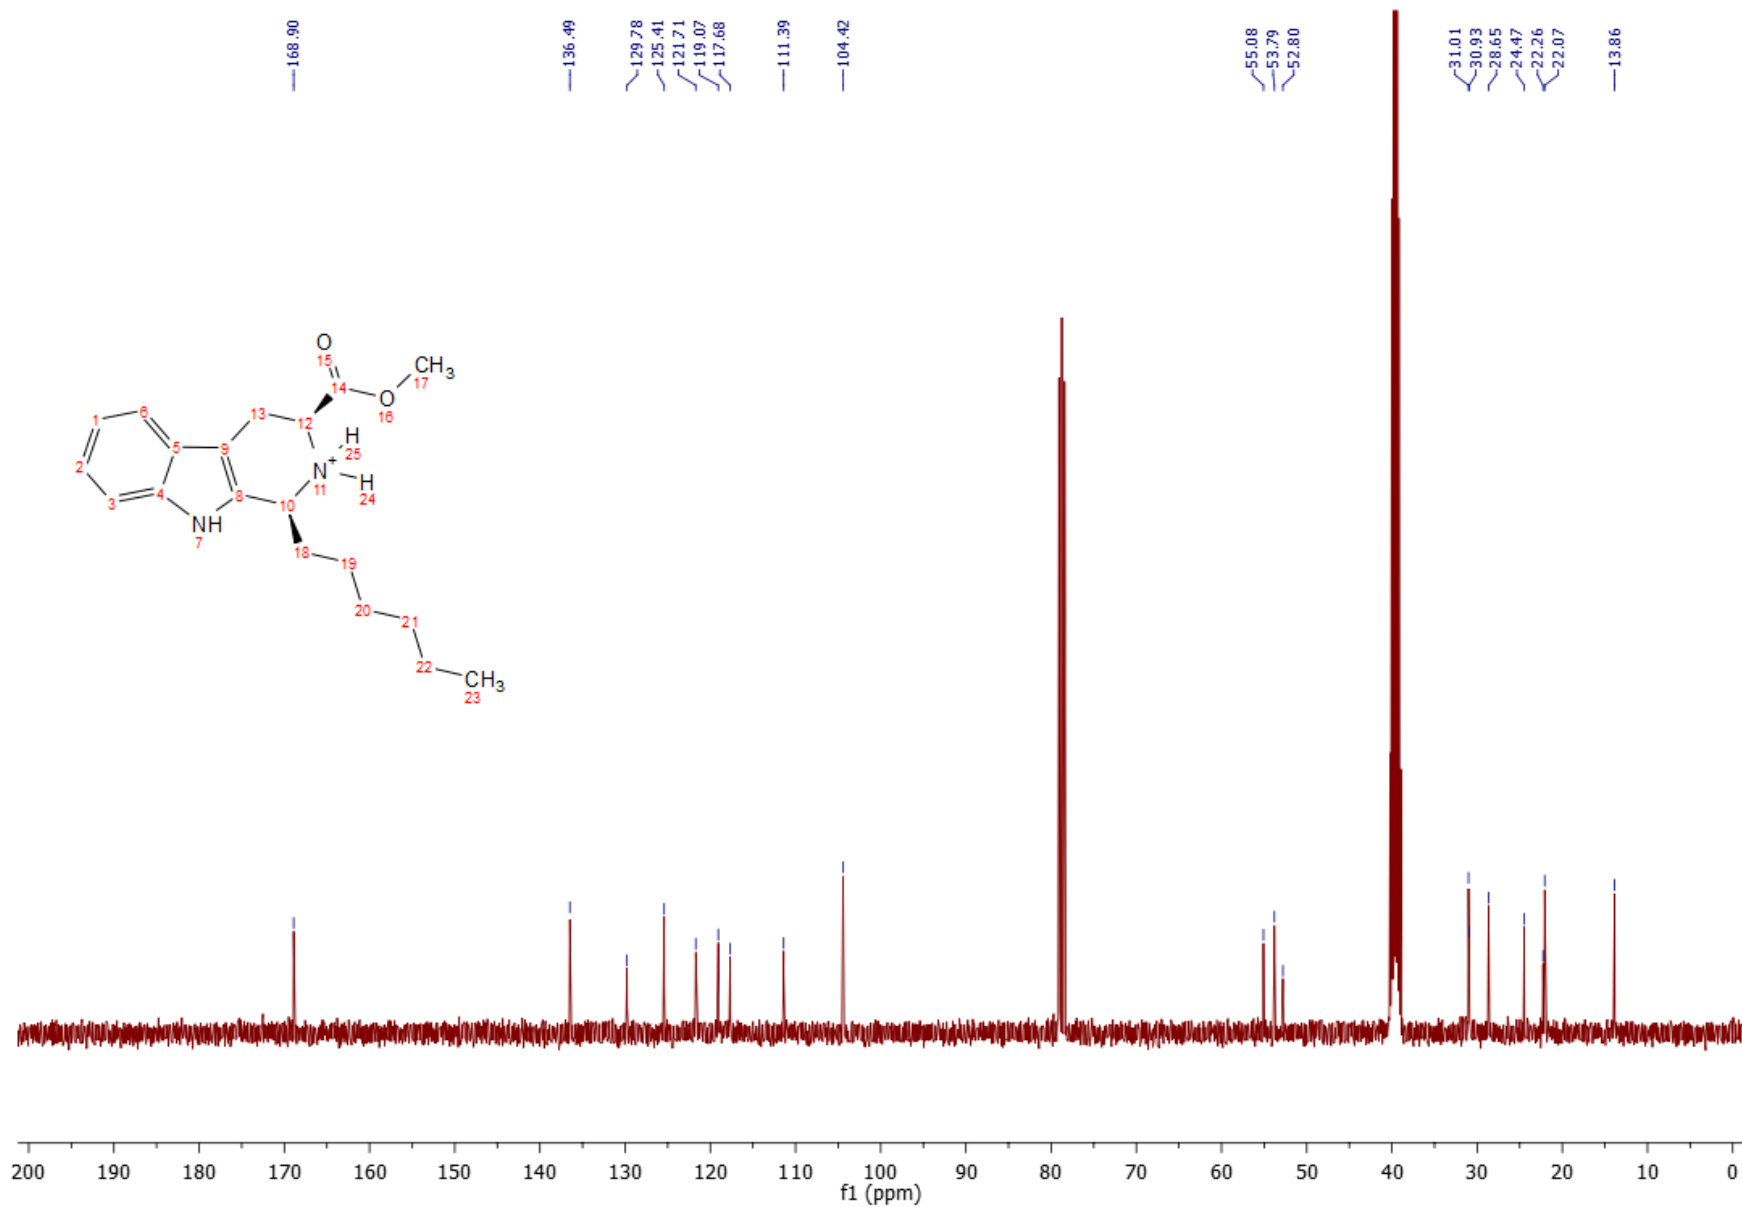

Figure S21: FT-IR (Neat): 8d

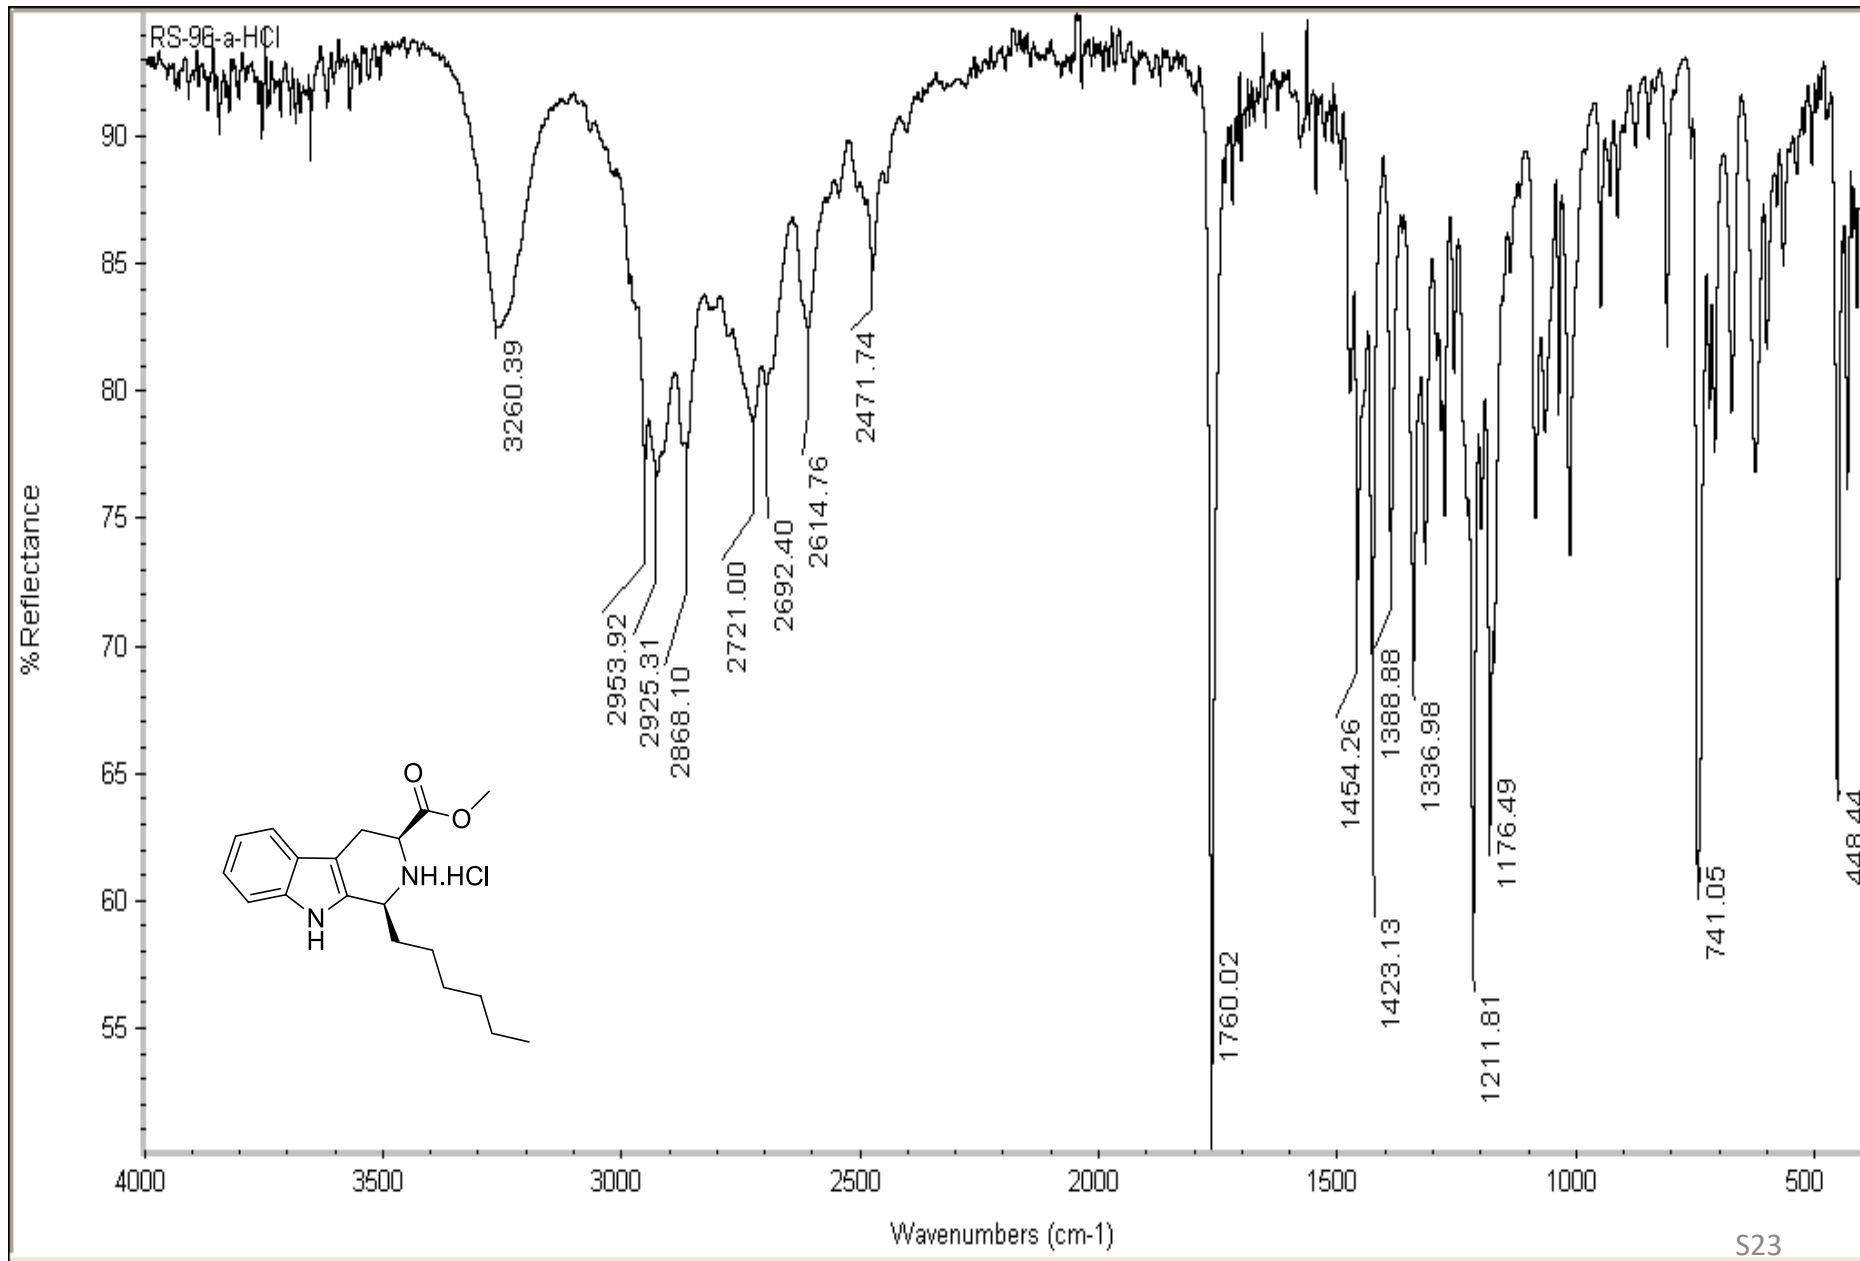

Figure S22: LC-MS: 8d

Peak Results

| Name | RT    | Area    | Height | Base Peak (m/z) |
|------|-------|---------|--------|-----------------|
| 1    | 2.539 | 1671685 | 360848 | 315.47          |
| 2    | 3.996 | 9849    | 4603   | 233.00          |
| 3    | 4.197 | 9468    | 1015   | 310.86          |
| 4    | 5.698 | 3357    | 1042   | 292.93          |

Auto-Scaled Chromatogram

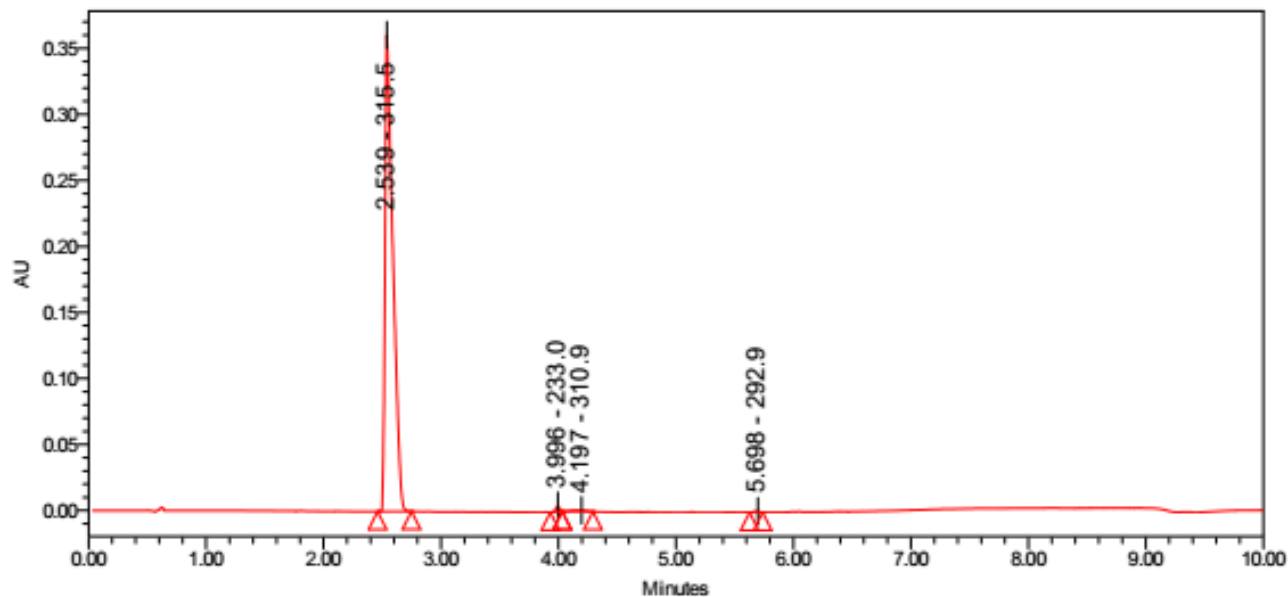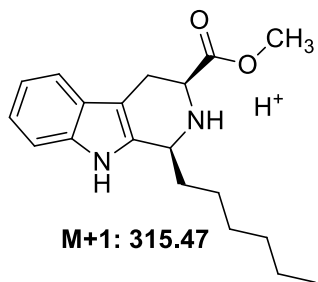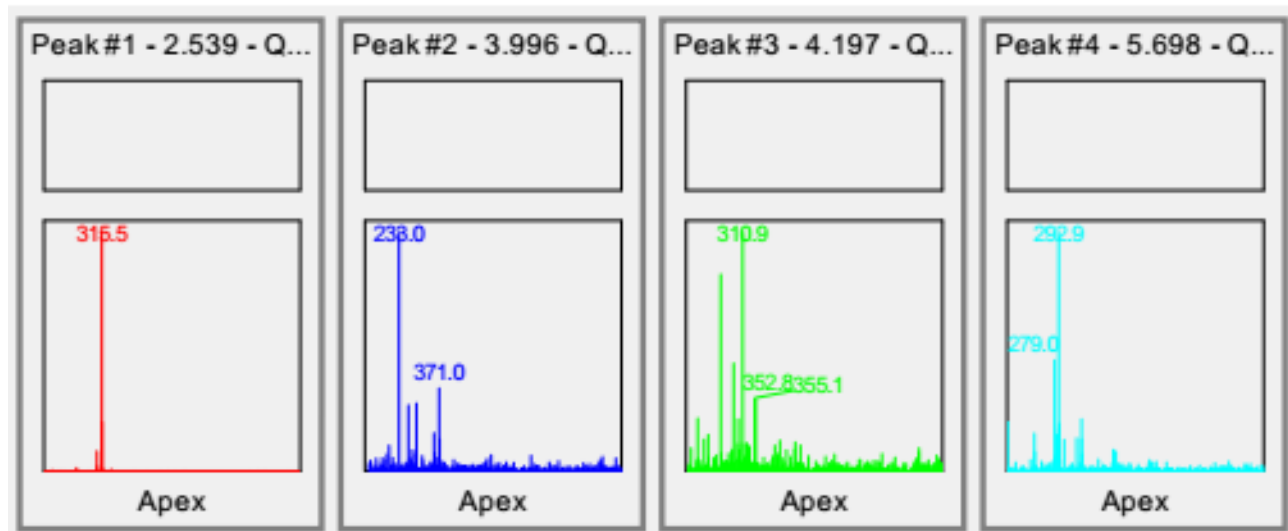



Figure S23:  $^1\text{H}$  NMR (400 MHz): 9d DMSO- $d_6$ + $\text{CDCl}_3$

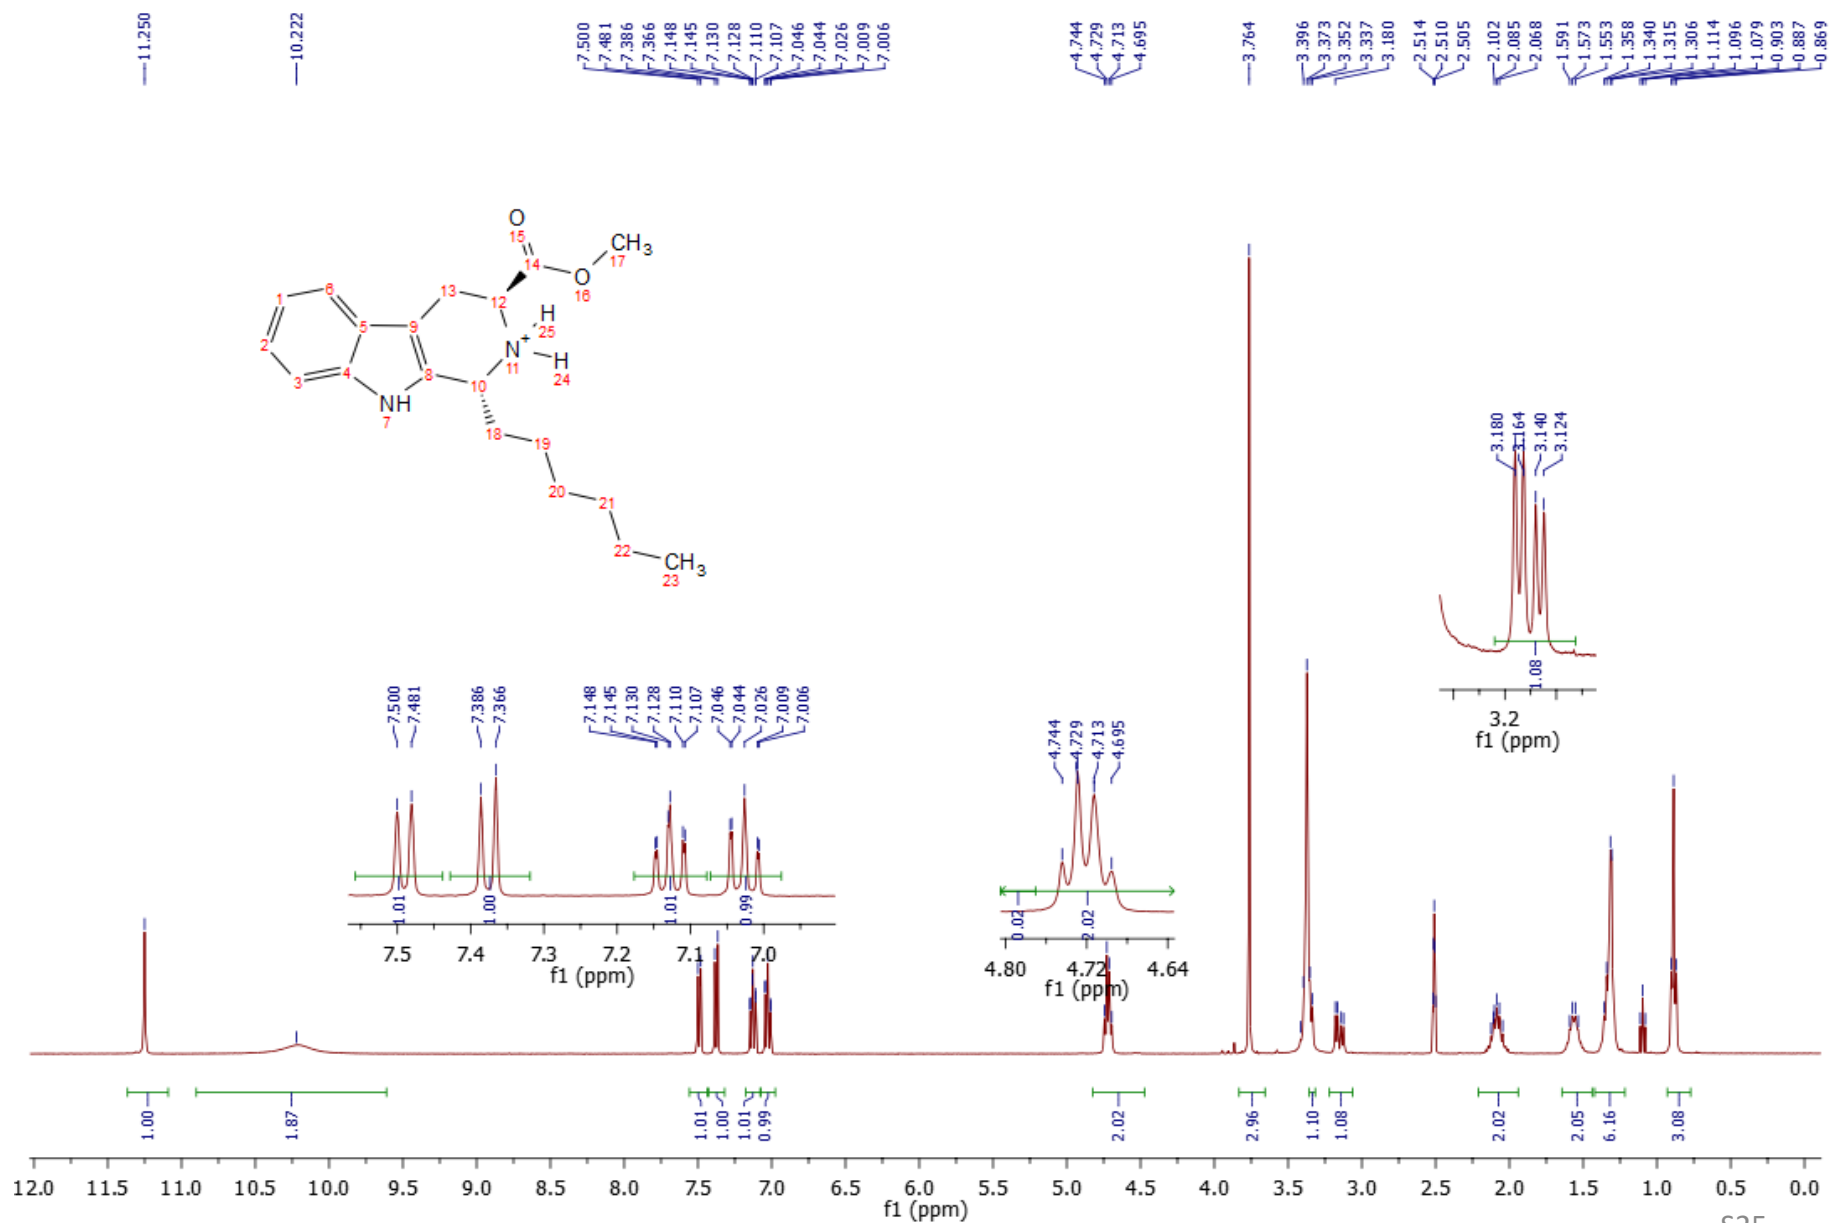

Figure S24:  $^{13}\text{C}$  (100 MHz): 9d DMSO- $d_6$ + $\text{CDCl}_3$

RS-96-b-HCL

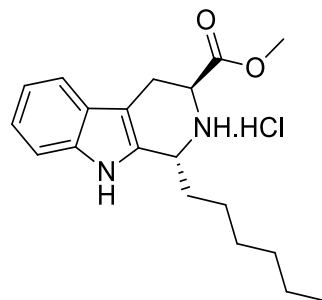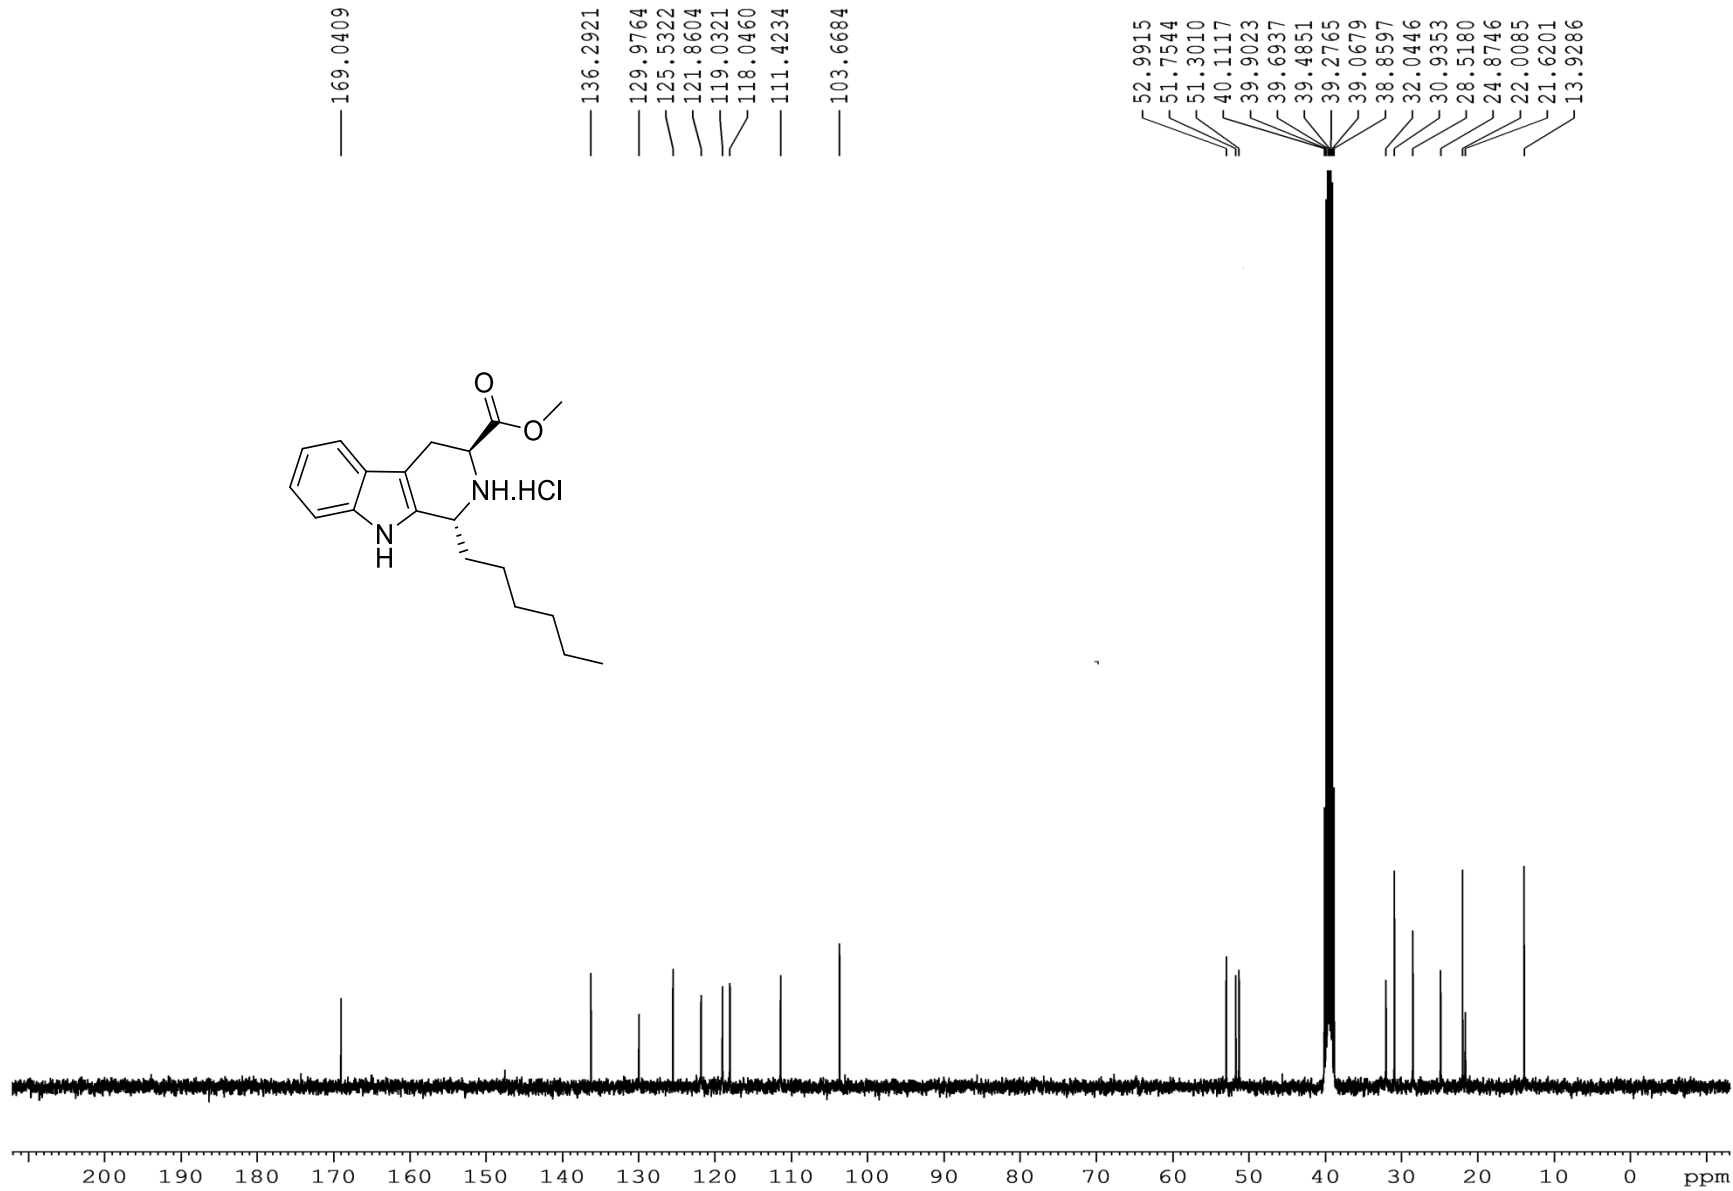

Figure S25: FT-IR (Neat): 9d

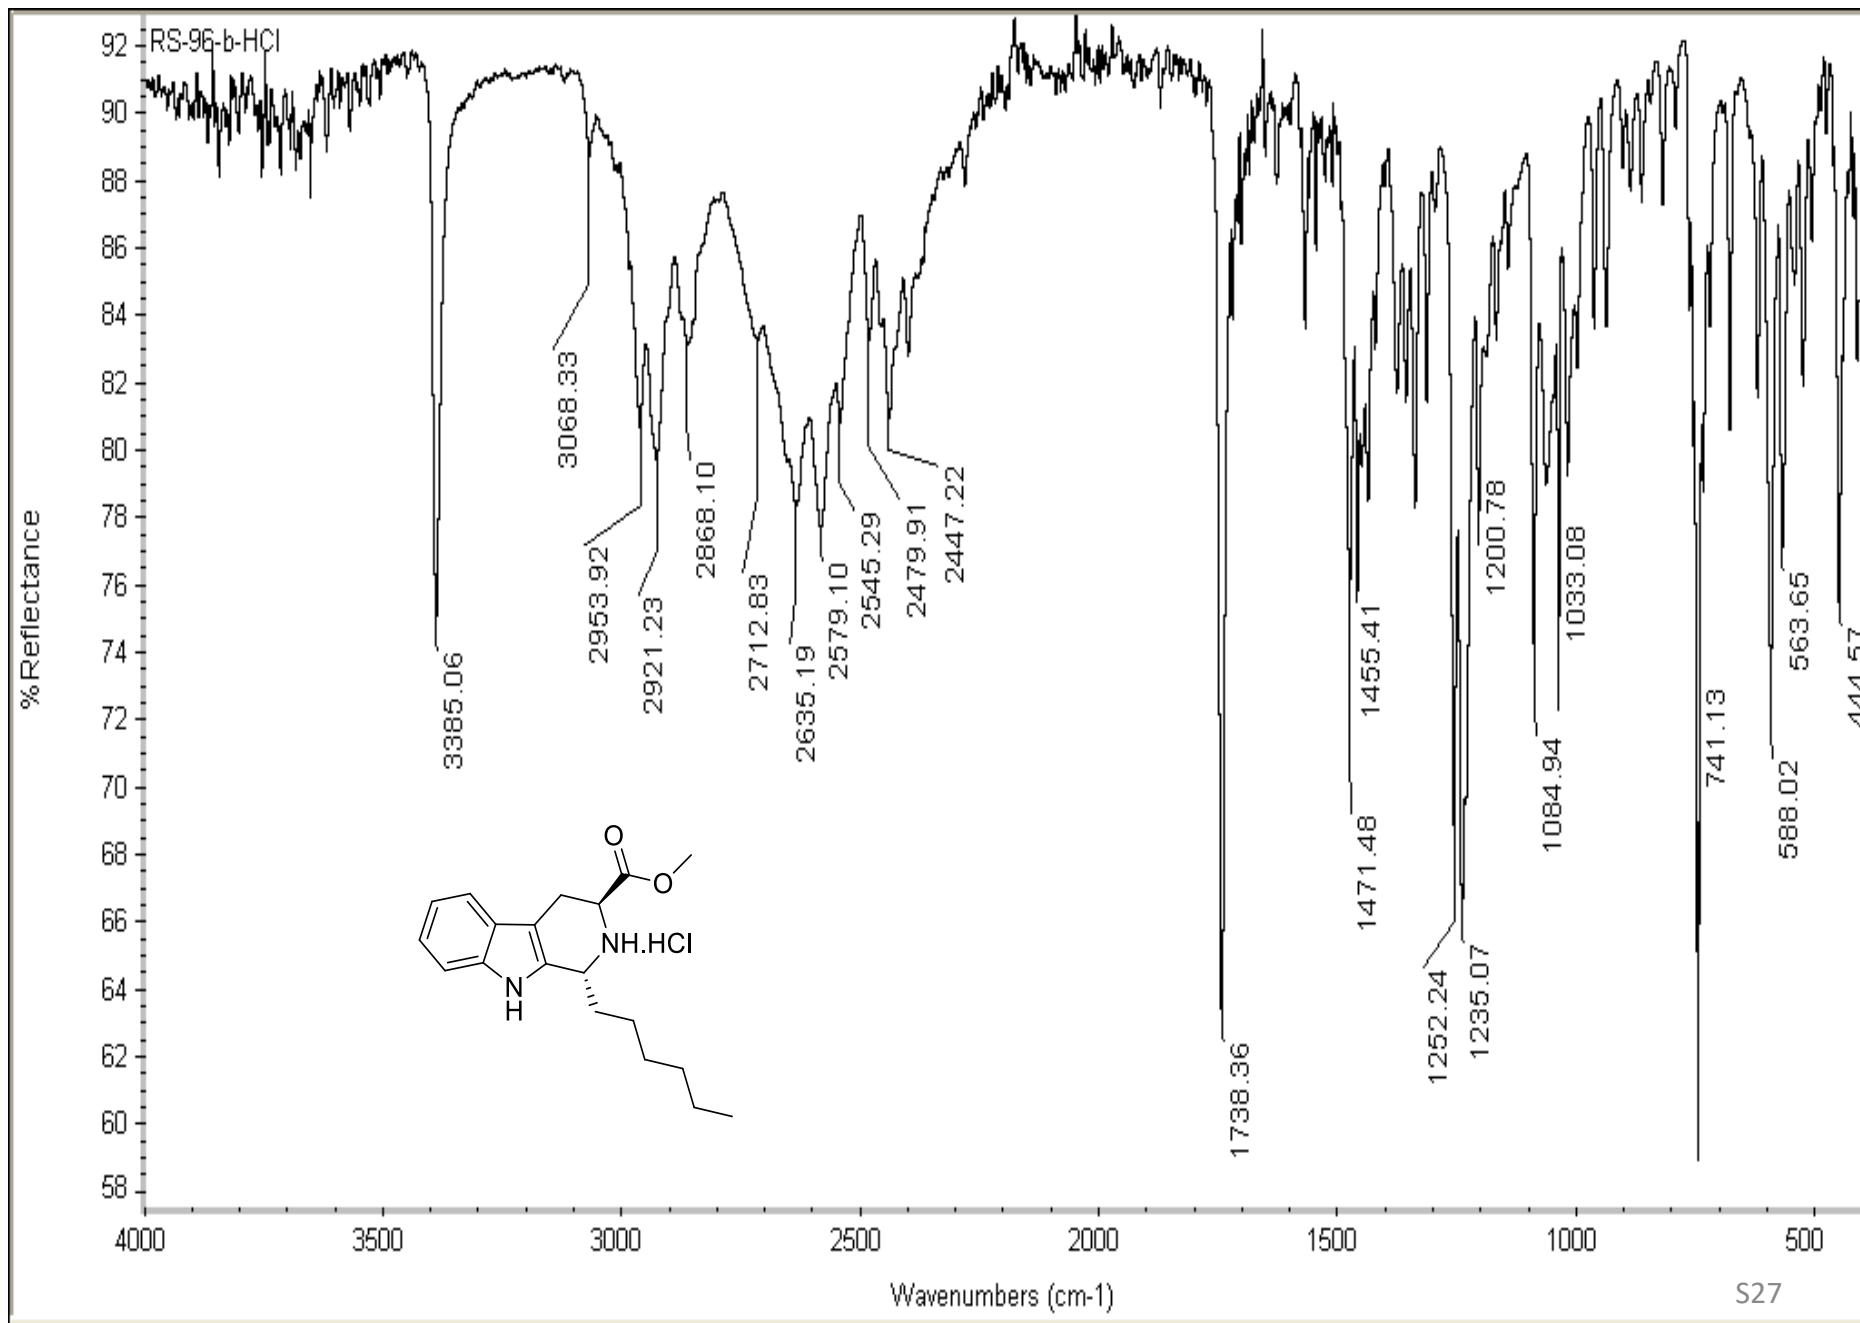

Figure S26: LC-MS: 9d

Auto-Scaled Chromatogram

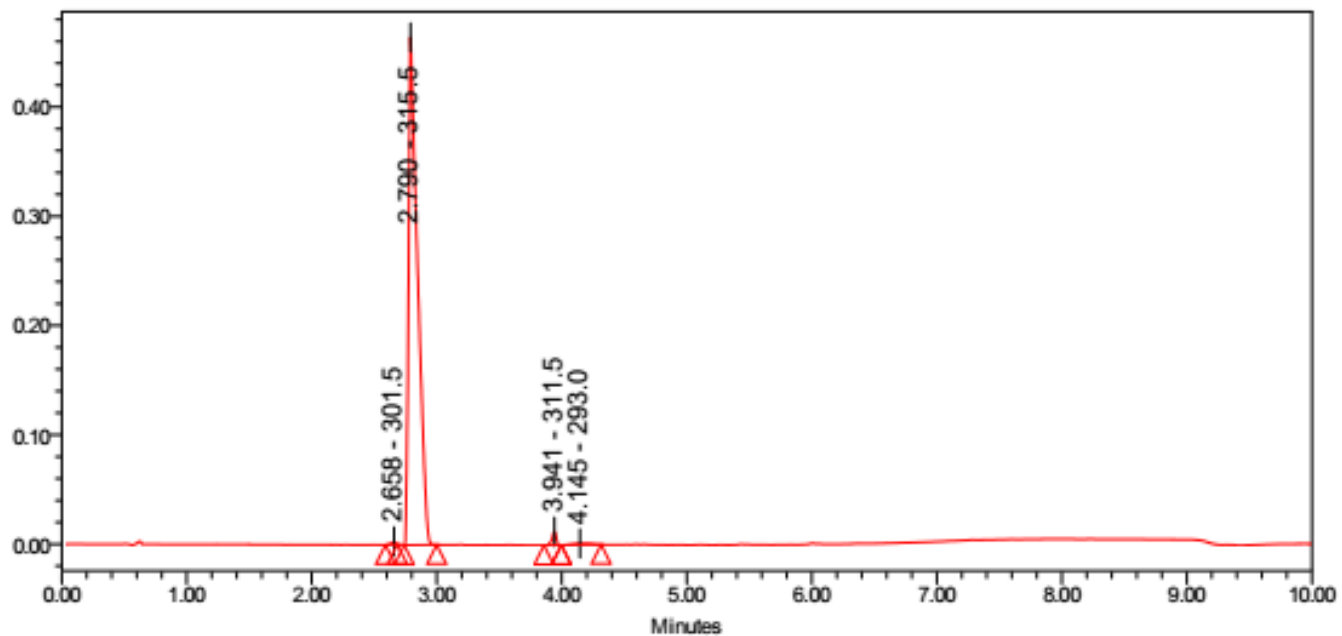

Peak Results

| Name | RT    | Area    | Height | Base Peak (m/z) |
|------|-------|---------|--------|-----------------|
| 1    | 2.658 | 6336    | 2854   | 301.54          |
| 2    | 2.790 | 2317197 | 464670 | 315.45          |
| 3    | 3.941 | 28645   | 12340  | 311.45          |
| 4    | 4.145 | 13957   | 1339   | 292.96          |

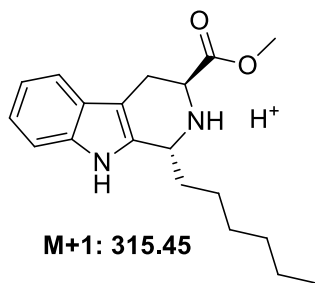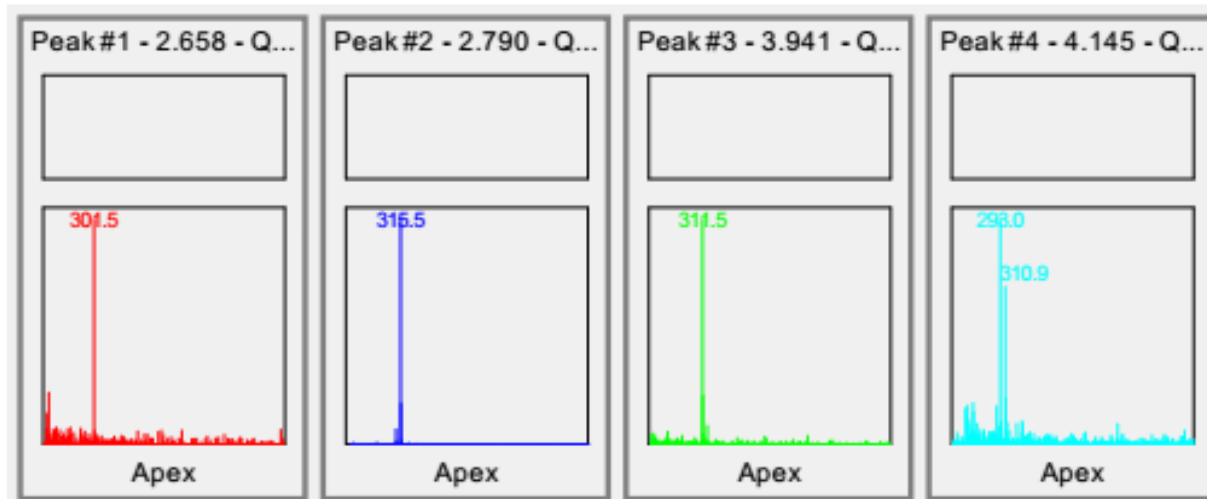

Figure S27:  $^1\text{H}$  NMR (400 MHz): 10 DMSO- $\text{d}_6$

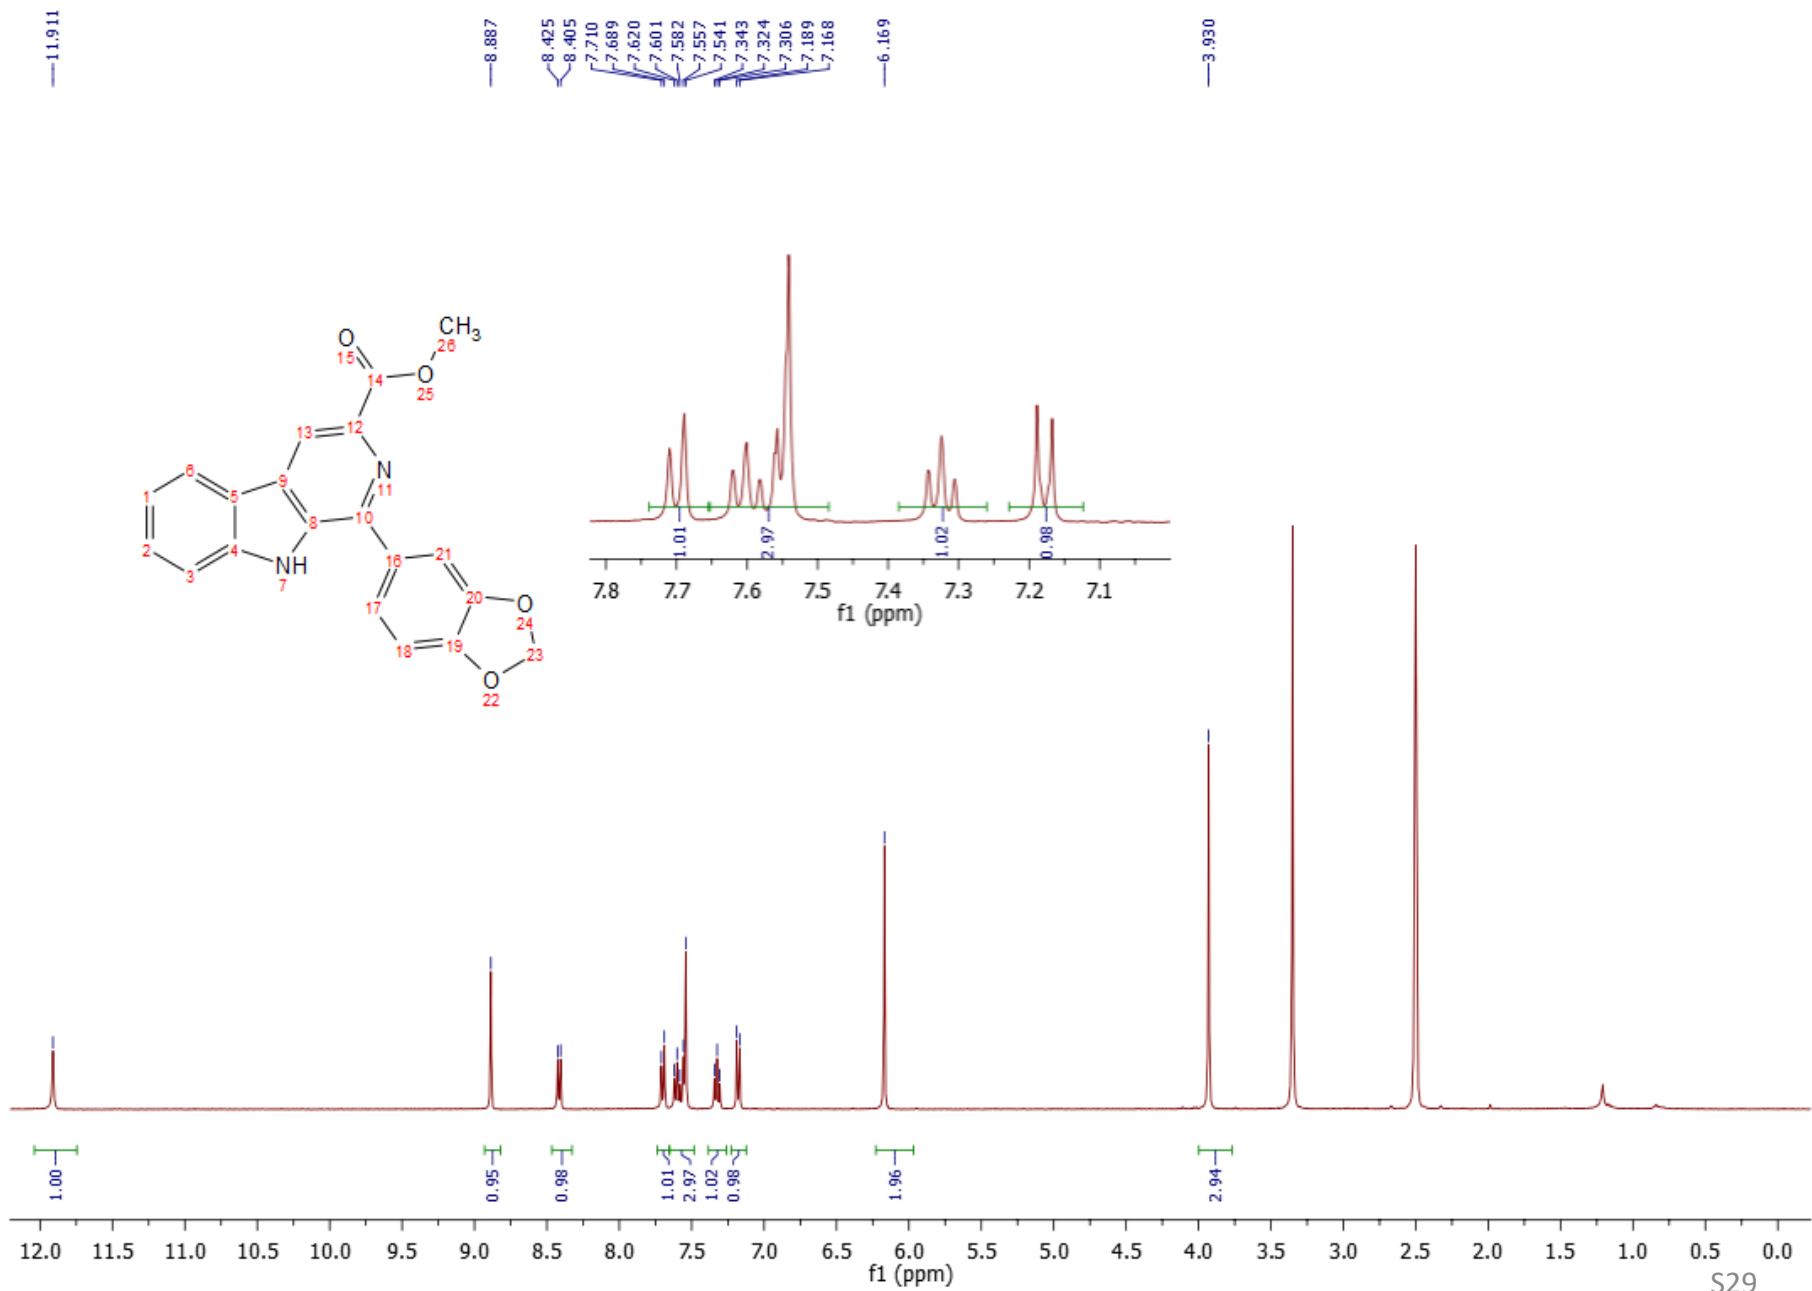

Figure S28: FT-IR (Neat): 10

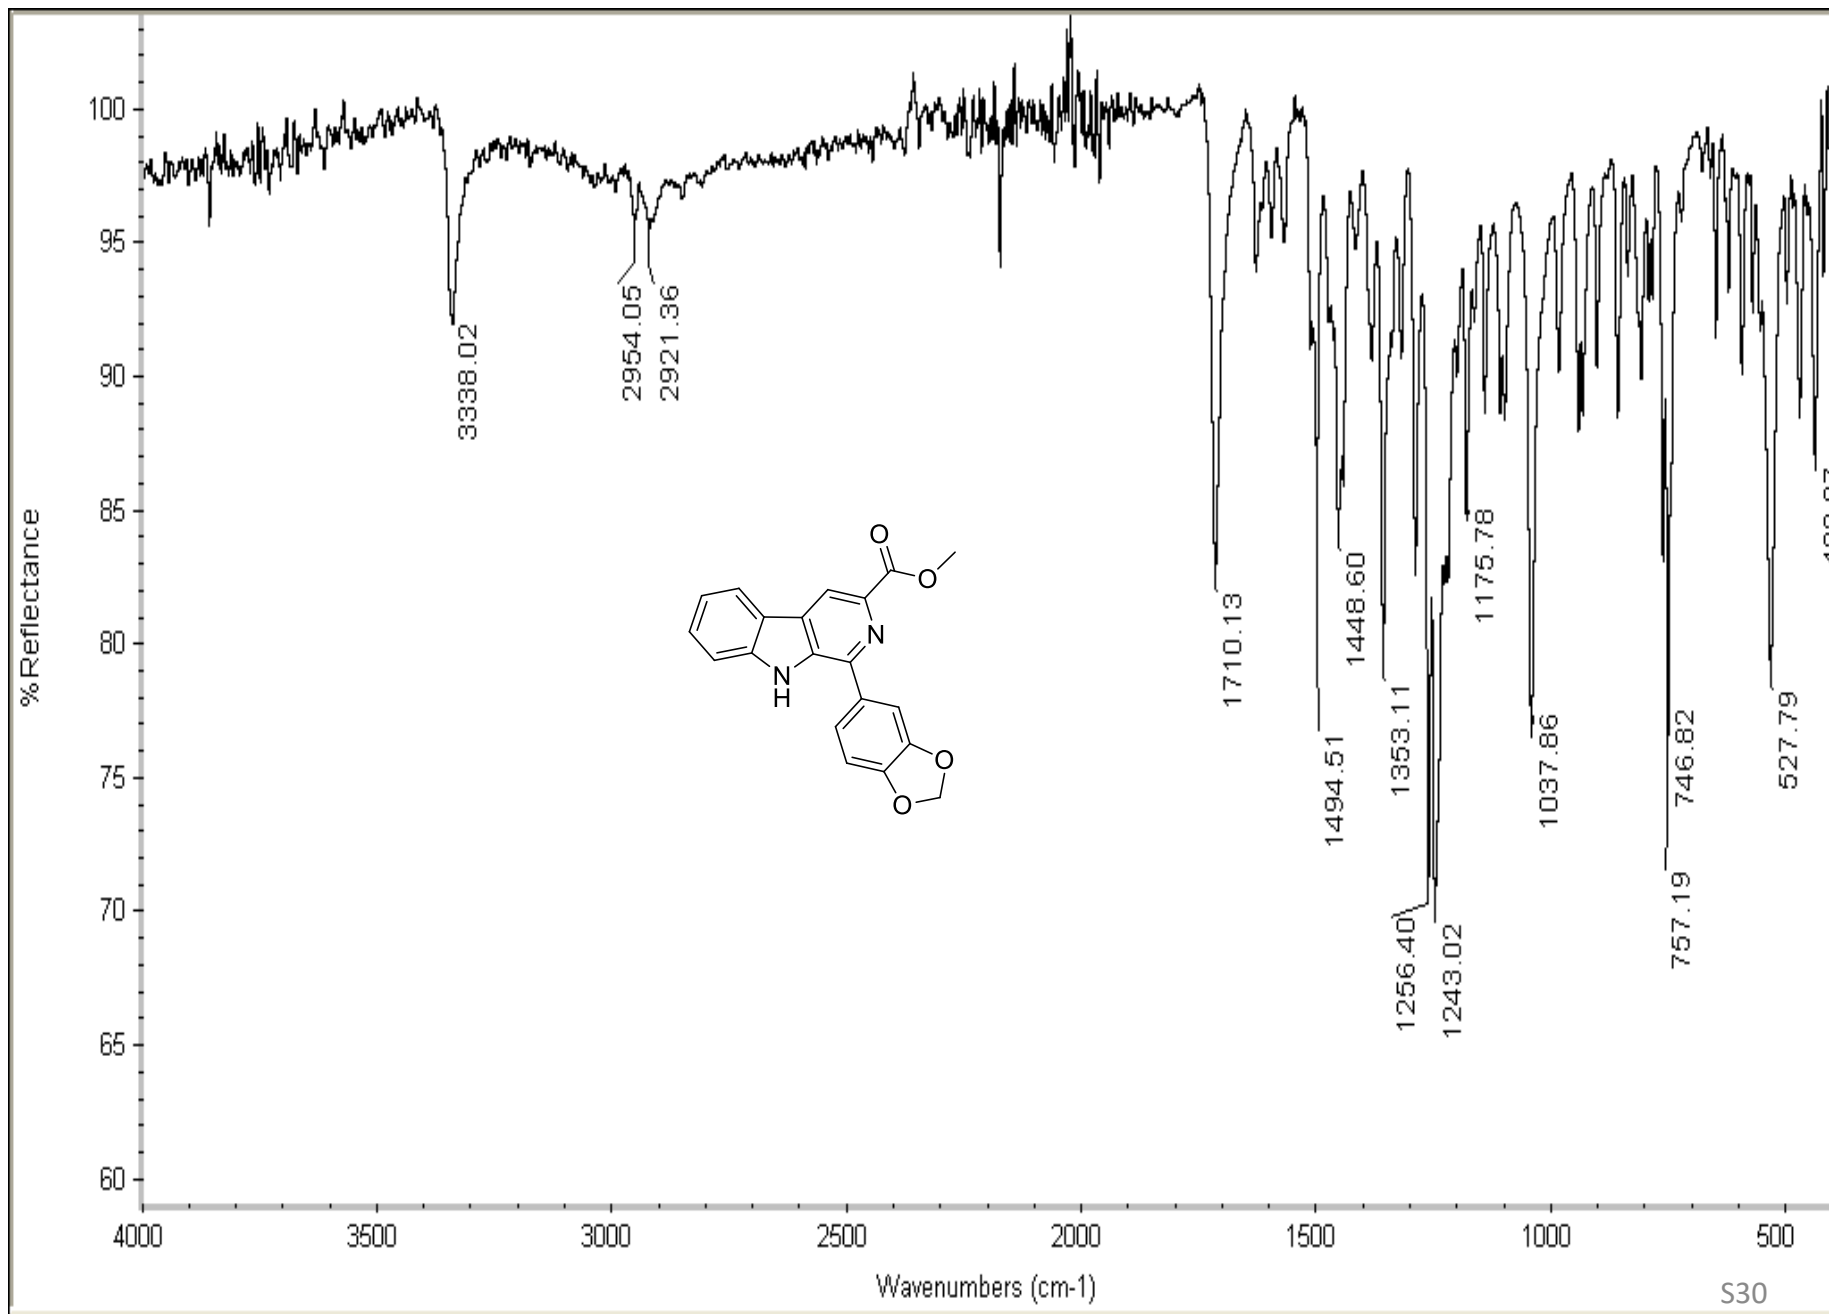

Supplement: ao8b01833_si_001.pdf [file ao8b01833_si_001.pdf]
